# Supplementary material for: Transcriptomic and Proteomic Analysis of the Tentacles and Mucus of Anthopleura dowii Verrill, 1869
Source: MDPI journal article supplement (doi:10.3390/md17080436), 2019-07-25
Supplement: s1 [file s1]

# Supplementary information: Transcriptomic and Proteomic Analysis of Tentacles and Mucus of *Anthopleura dowii* Verrill, 1869.

**Santos Ramírez-Carreto**<sup>1</sup>, **Rosario Vera-Estrella**<sup>2</sup>, **Tobías Portillo-Bobadilla**<sup>3</sup>, **Alexei Licea-Navarro**<sup>4</sup>, **Johanna Bernaldez-Sarabia**<sup>4</sup>, **Enrique Rudiño-Piñera**<sup>1</sup>, **Jerome J. Verleyen**<sup>5</sup>, **Estefanía Rodríguez**<sup>6</sup> and **Claudia Rodríguez-Almazán**<sup>1,\*</sup>

- <sup>1</sup> Departamento de Medicina Molecular y Bioprocesos, Instituto de Biotecnología, Universidad Nacional Autónoma de México, Avenida Universidad 2001, Cuernavaca, Morelos 62210, México; santos@ibt.unam.mx (S.R.-C.); rudino@ibt.unam.mx (E.R.-P.); claudiar@comunidad.unam.mx (C.R.-A.).
- <sup>2</sup> Departamento de Biología Molecular de Plantas, Instituto de Biotecnología, Universidad Nacional Autónoma de México, Avenida Universidad 2001, Cuernavaca, Morelos 62210, México; rosario@ibt.unam.mx (R.V.-E.).
- <sup>3</sup> Unidad de Bioinformática, Bioestadística y Biología Computacional. Red de Apoyo a la Investigación, Coordinación de la Investigación Científica, Universidad Nacional Autónoma de México-Instituto Nacional De Ciencias Médicas y Nutrición Salvador Zubirán, Calle Vasco de Quiroga 15, Tlalpan, C.P. 14080, Ciudad de México, México. tobias@cic.unam.mx (T.P.-B.).
- <sup>4</sup> Departamento de Innovación Biomédica, CICESE, Carretera Ensenada-Tijuana 3918, Ensenada, BC C.P. 22860, México; alicea@cicese.mx (A.L.-N.); jbernal@cicese.edu.mx (J. B.-S.).
- <sup>5</sup> Unidad Universitaria de Secuenciación Masiva y Bioinformática, Instituto de Biotecnología, Universidad Nacional Autónoma de México, Avenida Universidad 2001, Cuernavaca, Morelos 62210, México; jerome@ibt.unam.mx (J.J.V.).
- <sup>6</sup> Division of Invertebrate Zoology, American Museum of Natural History, Central Park West at 79th Street, New York NY 10024, USA. erodriguez@amnh.org (E.-R.).

## Alignments multiple of amino acid sequences corresponding to precursors from putatives venom components inferred from the transcripts obtained from the tentacles of *A. dowii*.

In all the alignments, the region corresponding to the signal peptide is highlighted in orange, in green is highlighted the region of propeptide and in blue is highlighted the region of mature protein. In some cases, the conserved Cys residues are highlighted in bold blue and in bold letters. The number of amino acids (aa) and the percentages of identity (I%) are calculated considering only the regions of the mature protein, this last value is calculated with the program LALIGN version 2.1.30 and with respect to the sequence indicated with 100% identity in the alignment. In some cases, the percentage of similitude (%S) also is showed, this value also calculated with the program LALIGN version 2.1.30 and considering only the regions of the mature protein and with respect to the sequence indicated with 100% similarity in the alignments. All alignments were made with ClustalX 2.1 and the characters (\*), (:), and (.) are shown in the low region along the alignments to indicate positions with fully conserved residues, positions with conservative substitutions and positions with less conservative substitutions, respectively.

### A) Sea anemone type 1 potassium channel toxin family. Type 1b subfamily.

|                     |                                                                                                                                        | aa | %I         | PSI-BLAST<br>E-value |
|---------------------|----------------------------------------------------------------------------------------------------------------------------------------|----|------------|----------------------|
| <b>c23125_g1_i1</b> | MNSKLVIVFLLCAILVSVTSRRVRTWDDFERDQDYEEEPAPYG--KRA <b>CK</b> DNYSAA <b>TCK</b> DVKKNN <b>CG</b> SEKYAT <b>NC</b> AK <b>T<b>CGKC</b></b>  | 36 | <b>100</b> |                      |
| Kappa-AITX-Aeq4a    | -----G <b>CK</b> DNFSAN <b>TCK</b> HVKANN <b>CG</b> SQKYAT <b>NC</b> AK <b>T<b>CGKC</b></b>                                            | 36 | 83.3       | 4e-14                |
| Kappa-AITX-Avd6a    | -----A <b>CK</b> DNFAAAT <b>CK</b> HVKENK <b>CG</b> SQKYAT <b>NC</b> AK <b>T<b>CGKC</b></b>                                            | 36 | 83.3       | 2e-14                |
| U-AITX-Avd11a       | -----LVVSVTSRRVRFWDDFERDENFEEERP <b>YLR</b> NVKRA <b>C</b> NDYKSS <b>YCR</b> SVGS <b>RNEC</b> GIHKYR <b>MYCR</b> K <b>T<b>CGSC</b></b> | 36 | 47.2       | 8e-20                |
|                     | .*: *    ::    *: *    .::*: *    .**    *    *****                                                                                    |    |            |                      |

## B) Venom Kunitz-type family, Sea anemone type 2 potassium channel toxin subfamily.

### B.1)

|                     |                                                                                                    |    |      |      |      |      |      |       |       | PSI-BLAST |         |         |         |         |
|---------------------|----------------------------------------------------------------------------------------------------|----|------|------|------|------|------|-------|-------|-----------|---------|---------|---------|---------|
|                     |                                                                                                    |    |      |      |      |      |      |       |       | E-value   | E-value | E-value | E-value | E-value |
| c17454_g1_i1        | ---MMKTLFLMSLAMLAVTMAPDSD---FCFLAPEVGKCRGHIRRYYYSTETGKQQFFYGGCGGNRNNFQSEDECRATCYPREK-----          | aa | %I   | %I   | %I   | %I   | %I   |       |       |           |         |         |         |         |
| KappaPI-SHTX-Shd2a  | ---MAKLYFLCLALVACLTMATEEMPA---LCHLQPDVPGKRGYFPRYYNPEVVGKCEQFIYGGCGGNKNNFVSFEACRATCIIPL-----        | 61 | 100  | 42.9 | 44.3 | 37.5 | 50.8 |       |       |           |         |         |         |         |
| c27319_g1_i5        | ---MSLQKLLFATVVITACLFMRITVDGKPSRKKLCTLEPDSDGNCYGYFPSYYNPNSSGRCENFYGGCGGNANNFSTLKSACAVCRACK-----    | 62 | 54.0 | 51.6 | 48.4 | 35.1 | 41.9 | 3e-21 | 6e-20 | 1e-17     | 5e-12   | 1e-12   |         |         |
| c14257_g1_i1        | ---MKMRSVTLISIVVFSGAFAPARPEY---CNLPYETGKCMAYIPSYFYDPSTGTCTDQFIYGGCGGNKNNFDTLAAEKTCTMV-----         | 62 | 42.9 | 100  | 46.8 | 43.2 | 50.0 | ----- | ----- | -----     | -----   | -----   | -----   | -----   |
| c14874_g1_i1        | ---MAKSATLMVFLLCFFLVADVSYGINS---ICLLPKKQGFCCRARFPFRYYNLSRRCEKFIYGGCGGNANNFHTLEECEKVCVGR-----S----- | 58 | 44.3 | 46.8 | 100  | 36.1 | 48.3 | ----- | ----- | -----     | -----   | -----   | -----   | -----   |
| KappaPI-AITX-Ael3a  | -----INS-----ICLLPKKQGFCCRARFPFRYYNLSRRCEKFIYGGCGGNANNFHTLEECEKVCVGR-----GEAWKAP-----              | 71 | 37.5 | 43.2 | 36.1 | 100  | 52.1 | ----- | ----- | -----     | -----   | -----   | -----   | -----   |
| KappaPI-AITX-Avd3d  | -----ING-----DCELPKVVGRCRARFPFRYYNLSRRCEKFIYGGCGGNANNFHTLEECEKVCVGR-----S-----                     | 65 | 37.9 | 48.5 | 42.4 | 80.3 | 55.4 | 1e-12 | 2e-14 | 2e-14     | 4e-36   | 4e-21   |         |         |
| c10_g1_i1           | ---MKDIPLTCVILFGLSLTSARED---ICLLPKKVGFCRALIPRFYFNSKTRCEGFIYGGCGGNKNNFISIKDCQKACM-----              | 59 | 42.6 | 51.6 | 50.0 | 59.2 | 50.8 | 4e-12 | 2e-15 | 2e-16     | 5e-23   | 4e-16   |         |         |
| KIn-II              | ---MSSGCLLLLGLLTLWAEITPVSG---RPRICELPAESGLCNAYIPSFYYNPHSHKCKQKFIYGGCGGNANNFHTLEECEKVCVGR-----      | 56 | 42.6 | 38.7 | 48.3 | 52.1 | 100  | ----- | ----- | -----     | -----   | -----   | -----   | -----   |
| Kunitz inhibitor IV | ---MSSGGLLLLGLLTLWAEITPISGQDRPKFCHLPVDSGICRAHIPRFYYNPNASNOCKQFIYGGCGGNANNFHTLEECEKVCVGR-----       | 57 | 47.5 | 50.0 | 53.4 | 40.8 | 45.6 | 1e-13 | 9e-17 | 2e-19     | 6e-17   | 4e-16   |         |         |
|                     | *****                                                                                              | 60 | 50.8 | 50.0 | 48.3 | 41.1 | 46.7 | 4e-17 | 1e-14 | 1e-16     | 9e-13   | 2e-11   |         |         |

### B.2)

|                |                                                                                                  |  |  |  |  |  |  |  |  | PSI-BLAST            |      |      |         |         |         |  |  |  |  |
|----------------|--------------------------------------------------------------------------------------------------|--|--|--|--|--|--|--|--|----------------------|------|------|---------|---------|---------|--|--|--|--|
|                |                                                                                                  |  |  |  |  |  |  |  |  | aa                   | %I   | %I   | E-value | E-value | E-value |  |  |  |  |
| PI-AITX-Axm2a  | -----APVNEDCLLPKKVGP---CRAAVPRFYNSDSGKCEGFTYGGCHANANNFKTKDECKNACH--                              |  |  |  |  |  |  |  |  | 58                   | 100  | 72.4 | 5e-31   | 8e-26   | 1e-20   |  |  |  |  |
| PI-AITX-Aeq3c  | -----YPANEGCLLPMKVGP---CRAAWPSYYNSKSEKCEEFTYGGCDANANNFQTEEECKKAC---                              |  |  |  |  |  |  |  |  | 57                   | 72.4 | 100  | 3e-27   | 5e-27   | 4e-19   |  |  |  |  |
| c27319_g1_i1   | MQKSNGINVKTVLLAALFCAFILILGLSLSKTAGAPANKDCLLPRMVGP---CRAAIPRFYNSKSGKCEGFTYGGCDANANNFKTEEECKNACHAA |  |  |  |  |  |  |  |  | 60                   | 78.3 | 75.0 | -----   | -----   | -----   |  |  |  |  |
| c27319_g1_i4   | -----MSLQKLLFATVVITACLFLSKISGAAANDDCHLPMKVGLCRASIPRFYFNSKSEKCEFTYGGCDANANNFKTEEECKEACHAT         |  |  |  |  |  |  |  |  | 57                   | 68.3 | 70.0 | -----   | -----   | -----   |  |  |  |  |
| c27319_g1_i3   | -----MSLQKLLFATVVITACLFLSNISGAAAN-VCLLPKVVGHCQAVIPRFYFNSKSEKCEFTYGGCGGNGNNFQTKDQCTNACTT-         |  |  |  |  |  |  |  |  | 55                   | 59.3 | 54.2 | -----   | -----   | -----   |  |  |  |  |
| ..* ** ** ** * |                                                                                                  |  |  |  |  |  |  |  |  | *:*** ** ** *.* ** * |      |      |         |         |         |  |  |  |  |

### B.3)

|                                                                                                                                                                                                                                                                                                                                                                                                                                                                                                                                                                                                                                                                                                                                                                                                                                                                                                                                                                                                                                                                                                                                                                                                                                                                                                                                                                                                                                                                                                                                                                                                                                                                                                                                                                                                                                                                                                                                                                                                                                                                                                                                                                                                                                                                                                                                                                                                                                                                                                                                                                                                                                                                                                                                                                                                                                                                                                                                                                                                                                                                                                                                                                                                                                                                                                                                                                                                                                                                                                                                                                                                                                                                                                                                                                                                                                                                                                                                                                                                                                                                                                                                                                                                                                                                                                                                                                                                                                                                                                                                                                                                                                                                                                                                                                                                                                                                                                                                                                                                                                                                                                                                                                                                                                                                                                                                                                                                                                                                                                                                                                                                                                                                                                                                                                                                                                                                                                                                                                                                                                                                                                                                                                                                                                                                                                                                                                                                                                                                                                                                                                                                                                                                                                                                                                                                                                                                                                                                                                                                                                                                                                                                                                                                                                                                                                                                                                                                                                                                                                                                                                                                                                                                                                                                                                                                                                                                                                                                                                                                                                                                                                                                                                                                                                                                                                                                                                                                                                                                                                                                                                                                                                                                                                                                                                                                                                                                                                                                                                                                                                                                                                                                                                                                                                                                                                                                                                                                                                                                                                                                                                                                                                                                                                                                                                                                                                                                                                                                                                                                                                                                                                                                                                                                                                                                                                                                                                                                                                                                                                                                                                                                                                                                                                                                                                                                                                                                                                                                                                                                                                                                                                                                                                                                                                                                                                                                                                                                                                                                                                                                                                                                                                                                                                                                                                                                                                                                                                                                                                                                                           |                                                                                             |    |      |      |       |       |       |  |  | PSI-BLAST |    |    |         |         |         |
|---------------------------------------------------------------------------------------------------------------------------------------------------------------------------------------------------------------------------------------------------------------------------------------------------------------------------------------------------------------------------------------------------------------------------------------------------------------------------------------------------------------------------------------------------------------------------------------------------------------------------------------------------------------------------------------------------------------------------------------------------------------------------------------------------------------------------------------------------------------------------------------------------------------------------------------------------------------------------------------------------------------------------------------------------------------------------------------------------------------------------------------------------------------------------------------------------------------------------------------------------------------------------------------------------------------------------------------------------------------------------------------------------------------------------------------------------------------------------------------------------------------------------------------------------------------------------------------------------------------------------------------------------------------------------------------------------------------------------------------------------------------------------------------------------------------------------------------------------------------------------------------------------------------------------------------------------------------------------------------------------------------------------------------------------------------------------------------------------------------------------------------------------------------------------------------------------------------------------------------------------------------------------------------------------------------------------------------------------------------------------------------------------------------------------------------------------------------------------------------------------------------------------------------------------------------------------------------------------------------------------------------------------------------------------------------------------------------------------------------------------------------------------------------------------------------------------------------------------------------------------------------------------------------------------------------------------------------------------------------------------------------------------------------------------------------------------------------------------------------------------------------------------------------------------------------------------------------------------------------------------------------------------------------------------------------------------------------------------------------------------------------------------------------------------------------------------------------------------------------------------------------------------------------------------------------------------------------------------------------------------------------------------------------------------------------------------------------------------------------------------------------------------------------------------------------------------------------------------------------------------------------------------------------------------------------------------------------------------------------------------------------------------------------------------------------------------------------------------------------------------------------------------------------------------------------------------------------------------------------------------------------------------------------------------------------------------------------------------------------------------------------------------------------------------------------------------------------------------------------------------------------------------------------------------------------------------------------------------------------------------------------------------------------------------------------------------------------------------------------------------------------------------------------------------------------------------------------------------------------------------------------------------------------------------------------------------------------------------------------------------------------------------------------------------------------------------------------------------------------------------------------------------------------------------------------------------------------------------------------------------------------------------------------------------------------------------------------------------------------------------------------------------------------------------------------------------------------------------------------------------------------------------------------------------------------------------------------------------------------------------------------------------------------------------------------------------------------------------------------------------------------------------------------------------------------------------------------------------------------------------------------------------------------------------------------------------------------------------------------------------------------------------------------------------------------------------------------------------------------------------------------------------------------------------------------------------------------------------------------------------------------------------------------------------------------------------------------------------------------------------------------------------------------------------------------------------------------------------------------------------------------------------------------------------------------------------------------------------------------------------------------------------------------------------------------------------------------------------------------------------------------------------------------------------------------------------------------------------------------------------------------------------------------------------------------------------------------------------------------------------------------------------------------------------------------------------------------------------------------------------------------------------------------------------------------------------------------------------------------------------------------------------------------------------------------------------------------------------------------------------------------------------------------------------------------------------------------------------------------------------------------------------------------------------------------------------------------------------------------------------------------------------------------------------------------------------------------------------------------------------------------------------------------------------------------------------------------------------------------------------------------------------------------------------------------------------------------------------------------------------------------------------------------------------------------------------------------------------------------------------------------------------------------------------------------------------------------------------------------------------------------------------------------------------------------------------------------------------------------------------------------------------------------------------------------------------------------------------------------------------------------------------------------------------------------------------------------------------------------------------------------------------------------------------------------------------------------------------------------------------------------------------------------------------------------------------------------------------------------------------------------------------------------------------------------------------------------------------------------------------------------------------------------------------------------------------------------------------------------------------------------------------------------------------------------------------------------------------------------------------------------------------------------------------------------------------------------------------------------------------------------------------------------------------------------------------------------------------------------------------------------------------------------------------------------------------------------------------------------------------------------------------------------------------------------------------------------------------------------------------------------------------------------------------------------------------------------------------------------------------------------------------------------------------------------------------------------------------------------------------------------------------------------------------------------------------------------------------------------------------------------------------------------------------------------------------------------------------------------------------------------------------------------------------------------------------------------------------------------------------------------------------------------------------------------------------------------------------------------------------------------------------------------------------------------------------------------------------------------------------------------------------------------------------------------------------------------------------------------------------------------------------------------------------------------------------------------------------------------------------------------------------------------------------------------------------------------------------------------------------------------------------------------------------------------------------------------------------------------------------------------------------------------------------------------------------------------------------------------------------------------------------------------------------------------------------------------------------------------------------------------------------------------------------------------------------------------------------------------------------------------------------------------------------------------------------------------------------------------------------------------------------------------------------------------------------------------------------------------------------------------------------------------------------------------------------------------------------------------------------------------------------------------------------------------------------------------------------------------------------------------------------|---------------------------------------------------------------------------------------------|----|------|------|-------|-------|-------|--|--|-----------|----|----|---------|---------|---------|
|                                                                                                                                                                                                                                                                                                                                                                                                                                                                                                                                                                                                                                                                                                                                                                                                                                                                                                                                                                                                                                                                                                                                                                                                                                                                                                                                                                                                                                                                                                                                                                                                                                                                                                                                                                                                                                                                                                                                                                                                                                                                                                                                                                                                                                                                                                                                                                                                                                                                                                                                                                                                                                                                                                                                                                                                                                                                                                                                                                                                                                                                                                                                                                                                                                                                                                                                                                                                                                                                                                                                                                                                                                                                                                                                                                                                                                                                                                                                                                                                                                                                                                                                                                                                                                                                                                                                                                                                                                                                                                                                                                                                                                                                                                                                                                                                                                                                                                                                                                                                                                                                                                                                                                                                                                                                                                                                                                                                                                                                                                                                                                                                                                                                                                                                                                                                                                                                                                                                                                                                                                                                                                                                                                                                                                                                                                                                                                                                                                                                                                                                                                                                                                                                                                                                                                                                                                                                                                                                                                                                                                                                                                                                                                                                                                                                                                                                                                                                                                                                                                                                                                                                                                                                                                                                                                                                                                                                                                                                                                                                                                                                                                                                                                                                                                                                                                                                                                                                                                                                                                                                                                                                                                                                                                                                                                                                                                                                                                                                                                                                                                                                                                                                                                                                                                                                                                                                                                                                                                                                                                                                                                                                                                                                                                                                                                                                                                                                                                                                                                                                                                                                                                                                                                                                                                                                                                                                                                                                                                                                                                                                                                                                                                                                                                                                                                                                                                                                                                                                                                                                                                                                                                                                                                                                                                                                                                                                                                                                                                                                                                                                                                                                                                                                                                                                                                                                                                                                                                                                                                                                                           |                                                                                             |    |      |      |       |       |       |  |  | aa        | %I | %I | E-value | E-value | E-value |
| cVamTi                                                                                                                                                                                                                                                                                                                                                                                                                                                                                                                                                                                                                                                                                                                                                                                                                                                                                                                                                                                                                                                                                                                                                                                                                                                                                                                                                                                                                                                                                                                                                                                                                                                                                                                                                                                                                                                                                                                                                                                                                                                                                                                                                                                                                                                                                                                                                                                                                                                                                                                                                                                                                                                                                                                                                                                                                                                                                                                                                                                                                                                                                                                                                                                                                                                                                                                                                                                                                                                                                                                                                                                                                                                                                                                                                                                                                                                                                                                                                                                                                                                                                                                                                                                                                                                                                                                                                                                                                                                                                                                                                                                                                                                                                                                                                                                                                                                                                                                                                                                                                                                                                                                                                                                                                                                                                                                                                                                                                                                                                                                                                                                                                                                                                                                                                                                                                                                                                                                                                                                                                                                                                                                                                                                                                                                                                                                                                                                                                                                                                                                                                                                                                                                                                                                                                                                                                                                                                                                                                                                                                                                                                                                                                                                                                                                                                                                                                                                                                                                                                                                                                                                                                                                                                                                                                                                                                                                                                                                                                                                                                                                                                                                                                                                                                                                                                                                                                                                                                                                                                                                                                                                                                                                                                                                                                                                                                                                                                                                                                                                                                                                                                                                                                                                                                                                                                                                                                                                                                                                                                                                                                                                                                                                                                                                                                                                                                                                                                                                                                                                                                                                                                                                                                                                                                                                                                                                                                                                                                                                                                                                                                                                                                                                                                                                                                                                                                                                                                                                                                                                                                                                                                                                                                                                                                                                                                                                                                                                                                                                                                                                                                                                                                                                                                                                                                                                                                                                                                                                                                                                                                    | MSSGGLLLLGLLTLWAEITPVSGQDHPKFCYLPADPGRCKAHIPIRFYIDSASNCKNFKIYGGCPGNANNFKTWDECRQTCGASAMGRPT  | 61 | 100  | 57.4 | 1e-19 | 8e-17 | 2e-18 |  |  |           |    |    |         |         |         |
| DrKin-II                                                                                                                                                                                                                                                                                                                                                                                                                                                                                                                                                                                                                                                                                                                                                                                                                                                                                                                                                                                                                                                                                                                                                                                                                                                                                                                                                                                                                                                                                                                                                                                                                                                                                                                                                                                                                                                                                                                                                                                                                                                                                                                                                                                                                                                                                                                                                                                                                                                                                                                                                                                                                                                                                                                                                                                                                                                                                                                                                                                                                                                                                                                                                                                                                                                                                                                                                                                                                                                                                                                                                                                                                                                                                                                                                                                                                                                                                                                                                                                                                                                                                                                                                                                                                                                                                                                                                                                                                                                                                                                                                                                                                                                                                                                                                                                                                                                                                                                                                                                                                                                                                                                                                                                                                                                                                                                                                                                                                                                                                                                                                                                                                                                                                                                                                                                                                                                                                                                                                                                                                                                                                                                                                                                                                                                                                                                                                                                                                                                                                                                                                                                                                                                                                                                                                                                                                                                                                                                                                                                                                                                                                                                                                                                                                                                                                                                                                                                                                                                                                                                                                                                                                                                                                                                                                                                                                                                                                                                                                                                                                                                                                                                                                                                                                                                                                                                                                                                                                                                                                                                                                                                                                                                                                                                                                                                                                                                                                                                                                                                                                                                                                                                                                                                                                                                                                                                                                                                                                                                                                                                                                                                                                                                                                                                                                                                                                                                                                                                                                                                                                                                                                                                                                                                                                                                                                                                                                                                                                                                                                                                                                                                                                                                                                                                                                                                                                                                                                                                                                                                                                                                                                                                                                                                                                                                                                                                                                                                                                                                                                                                                                                                                                                                                                                                                                                                                                                                                                                                                                                                                                  | MSSGGLLLLGLLTLWAEITPISGHRDPTFCNLAPESGRCAHLRRIYYNLESNCKEVFFYGGCGGNDNNFSTWDECRHTC---VGK--     | 60 | 57.4 | 100  | 8e-12 | 9e-18 | 2e-15 |  |  |           |    |    |         |         |         |
| c10125_g1_i1                                                                                                                                                                                                                                                                                                                                                                                                                                                                                                                                                                                                                                                                                                                                                                                                                                                                                                                                                                                                                                                                                                                                                                                                                                                                                                                                                                                                                                                                                                                                                                                                                                                                                                                                                                                                                                                                                                                                                                                                                                                                                                                                                                                                                                                                                                                                                                                                                                                                                                                                                                                                                                                                                                                                                                                                                                                                                                                                                                                                                                                                                                                                                                                                                                                                                                                                                                                                                                                                                                                                                                                                                                                                                                                                                                                                                                                                                                                                                                                                                                                                                                                                                                                                                                                                                                                                                                                                                                                                                                                                                                                                                                                                                                                                                                                                                                                                                                                                                                                                                                                                                                                                                                                                                                                                                                                                                                                                                                                                                                                                                                                                                                                                                                                                                                                                                                                                                                                                                                                                                                                                                                                                                                                                                                                                                                                                                                                                                                                                                                                                                                                                                                                                                                                                                                                                                                                                                                                                                                                                                                                                                                                                                                                                                                                                                                                                                                                                                                                                                                                                                                                                                                                                                                                                                                                                                                                                                                                                                                                                                                                                                                                                                                                                                                                                                                                                                                                                                                                                                                                                                                                                                                                                                                                                                                                                                                                                                                                                                                                                                                                                                                                                                                                                                                                                                                                                                                                                                                                                                                                                                                                                                                                                                                                                                                                                                                                                                                                                                                                                                                                                                                                                                                                                                                                                                                                                                                                                                                                                                                                                                                                                                                                                                                                                                                                                                                                                                                                                                                                                                                                                                                                                                                                                                                                                                                                                                                                                                                                                                                                                                                                                                                                                                                                                                                                                                                                                                                                                                                                                              | MVKQMIFVLF--LAMVVGLS---MARPEFCLLPAPKPGRCKAFAKRYFYDKSIGACRQFIYGGCKGNRNNFNSKSEKCDRICGARR----- | 59 | 52.5 | 39.3 | ----- | ----- | ----- |  |  |           |    |    |         |         |         |
| c10208_g1_i1                                                                                                                                                                                                                                                                                                                                                                                                                                                                                                                                                                                                                                                                                                                                                                                                                                                                                                                                                                                                                                                                                                                                                                                                                                                                                                                                                                                                                                                                                                                                                                                                                                                                                                                                                                                                                                                                                                                                                                                                                                                                                                                                                                                                                                                                                                                                                                                                                                                                                                                                                                                                                                                                                                                                                                                                                                                                                                                                                                                                                                                                                                                                                                                                                                                                                                                                                                                                                                                                                                                                                                                                                                                                                                                                                                                                                                                                                                                                                                                                                                                                                                                                                                                                                                                                                                                                                                                                                                                                                                                                                                                                                                                                                                                                                                                                                                                                                                                                                                                                                                                                                                                                                                                                                                                                                                                                                                                                                                                                                                                                                                                                                                                                                                                                                                                                                                                                                                                                                                                                                                                                                                                                                                                                                                                                                                                                                                                                                                                                                                                                                                                                                                                                                                                                                                                                                                                                                                                                                                                                                                                                                                                                                                                                                                                                                                                                                                                                                                                                                                                                                                                                                                                                                                                                                                                                                                                                                                                                                                                                                                                                                                                                                                                                                                                                                                                                                                                                                                                                                                                                                                                                                                                                                                                                                                                                                                                                                                                                                                                                                                                                                                                                                                                                                                                                                                                                                                                                                                                                                                                                                                                                                                                                                                                                                                                                                                                                                                                                                                                                                                                                                                                                                                                                                                                                                                                                                                                                                                                                                                                                                                                                                                                                                                                                                                                                                                                                                                                                                                                                                                                                                                                                                                                                                                                                                                                                                                                                                                                                                                                                                                                                                                                                                                                                                                                                                                                                                                                                                                                                              | -----MARPKYCLLPKVGGLCMASMRYYYEKSIAKCSQFFYGGCGGNKNNFKTMDECVKTCALL-----                       | 58 | 50.8 | 53.3 | ----- | ----- | ----- |  |  |           |    |    |         |         |         |
| c10208_g1_i2                                                                                                                                                                                                                                                                                                                                                                                                                                                                                                                                                                                                                                                                                                                                                                                                                                                                                                                                                                                                                                                                                                                                                                                                                                                                                                                                                                                                                                                                                                                                                                                                                                                                                                                                                                                                                                                                                                                                                                                                                                                                                                                                                                                                                                                                                                                                                                                                                                                                                                                                                                                                                                                                                                                                                                                                                                                                                                                                                                                                                                                                                                                                                                                                                                                                                                                                                                                                                                                                                                                                                                                                                                                                                                                                                                                                                                                                                                                                                                                                                                                                                                                                                                                                                                                                                                                                                                                                                                                                                                                                                                                                                                                                                                                                                                                                                                                                                                                                                                                                                                                                                                                                                                                                                                                                                                                                                                                                                                                                                                                                                                                                                                                                                                                                                                                                                                                                                                                                                                                                                                                                                                                                                                                                                                                                                                                                                                                                                                                                                                                                                                                                                                                                                                                                                                                                                                                                                                                                                                                                                                                                                                                                                                                                                                                                                                                                                                                                                                                                                                                                                                                                                                                                                                                                                                                                                                                                                                                                                                                                                                                                                                                                                                                                                                                                                                                                                                                                                                                                                                                                                                                                                                                                                                                                                                                                                                                                                                                                                                                                                                                                                                                                                                                                                                                                                                                                                                                                                                                                                                                                                                                                                                                                                                                                                                                                                                                                                                                                                                                                                                                                                                                                                                                                                                                                                                                                                                                                                                                                                                                                                                                                                                                                                                                                                                                                                                                                                                                                                                                                                                                                                                                                                                                                                                                                                                                                                                                                                                                                                                                                                                                                                                                                                                                                                                                                                                                                                                                                                                                                              | -----MARPKYCLLPKIGRCRARILRYYDKSNAKCSQFYGGCGGNRNNFETRHECVKTCALL-----                         | 58 | 54.1 | 50.0 | ----- | ----- | ----- |  |  |           |    |    |         |         |         |
| * : * : * : * : * : * : * : * : * : * : * : * : * : * : * : * : * : * : * : * : * : * : * : * : * : * : * : * : * : * : * : * : * : * : * : * : * : * : * : * : * : * : * : * : * : * : * : * : * : * : * : * : * : * : * : * : * : * : * : * : * : * : * : * : * : * : * : * : * : * : * : * : * : * : * : * : * : * : * : * : * : * : * : * : * : * : * : * : * : * : * : * : * : * : * : * : * : * : * : * : * : * : * : * : * : * : * : * : * : * : * : * : * : * : * : * : * : * : * : * : * : * : * : * : * : * : * : * : * : * : * : * : * : * : * : * : * : * : * : * : * : * : * : * : * : * : * : * : * : * : * : * : * : * : * : * : * : * : * : * : * : * : * : * : * : * : * : * : * : * : * : * : * : * : * : * : * : * : * : * : * : * : * : * : * : * : * : * : * : * : * : * : * : * : * : * : * : * : * : * : * : * : * : * : * : * : * : * : * : * : * : * : * : * : * : * : * : * : * : * : * : * : * : * : * : * : * : * : * : * : * : * : * : * : * : * : * : * : * : * : * : * : * : * : * : * : * : * : * : * : * : * : * : * : * : * : * : * : * : * : * : * : * : * : * : * : * : * : * : * : * : * : * : * : * : * : * : * : * : * : * : * : * : * : * : * : * : * : * : * : * : * : * : * : * : * : * : * : * : * : * : * : * : * : * : * : * : * : * : * : * : * : * : * : * : * : * : * : * : * : * : * : * : * : * : * : * : * : * : * : * : * : * : * : * : * : * : * : * : * : * : * : * : * : * : * : * : * : * : * : * : * : * : * : * : * : * : * : * : * : * : * : * : * : * : * : * : * : * : * : * : * : * : * : * : * : * : * : * : * : * : * : * : * : * : * : * : * : * : * : * : * : * : * : * : * : * : * : * : * : * : * : * : * : * : * : * : * : * : * : * : * : * : * : * : * : * : * : * : * : * : * : * : * : * : * : * : * : * : * : * : * : * : * : * : * : * : * : * : * : * : * : * : * : * : * : * : * : * : * : * : * : * : * : * : * : * : * : * : * : * : * : * : * : * : * : * : * : * : * : * : * : * : * : * : * : * : * : * : * : * : * : * : * : * : * : * : * : * : * : * : * : * : * : * : * : * : * : * : * : * : * : * : * : * : * : * : * : * : * : * : * : * : * : * : * : * : * : * : * : * : * : * : * : * : * : * : * : * : * : * : * : * : * : * : * : * : * : * : * : * : * : * : * : * : * : * : * : * : * : * : * : * : * : * : * : * : * : * : * : * : * : * : * : * : * : * : * : * : * : * : * : * : * : * : * : * : * : * : * : * : * : * : * : * : * : * : * : * : * : * : * : * : * : * : * : * : * : * : * : * : * : * : * : * : * : * : * : * : * : * : * : * : * : * : * : * : * : * : * : * : * : * : * : * : * : * : * : * : * : * : * : * : * : * : * : * : * : * : * : * : * : * : * : * : * : * : * : * : * : * : * : * : * : * : * : * : * : * : * : * : * : * : * : * : * : * : * : * : * : * : * : * : * : * : * : * : * : * : * : * : * : * : * : * : * : * : * : * : * : * : * : * : * : * : * : * : * : * : * : * : * : * : * : * : * : * : * : * : * : * : * : * : * : * : * : * : * : * : * : * : * : * : * : * : * : * : * : * : * : * : * : * : * : * : * : * : * : * : * : * : * : * : * : * : * : * : * : * : * : * : * : * : * : * : * : * : * : * : * : * : * : * : * : * : * : * : * : * : * : * : * : * : * : * : * : * : * : * : * : * : * : * : * : * : * : * : * : * : * : * : * : * : * : * : * : * : * : * : * : * : * : * : * : * : * : * : * : * : * : * : * : * : * : * : * : * : * : * : * : * : * : * : * : * : * : * : * : * : * : * : * : * : * : * : * : * : * : * : * : * : * : * : * : * : * : * : * : * : * : * : * : * : * : * : * : * : * : * : * : * : * : * : * : * : * : * : * : * : * : * : * : * : * : * : * : * : * : * : * : * : * : * : * : * : * : * : * : * : * : * : * : * : * : * : * : * : * : * : * : * : * : * : * : * : * : * : * : * : * : * : * : * : * : * : * : * : * : * : * : * : * : * : * : * : * : * : * : * : * : * : * : * : * : * : * : * : * : * : * : * : * : * : * : * : * : * : * : * : * : * : * : * : * : * : * : * : * : * : * : * : * : * : * : * : * : * : * : * : * : * : * : * : * : * : * : * : * : * : * : * : * : * : * : * : * : * : * : * : * : * : * : * : * : * : * : * : * : * : * : * : * : * : * : * : * : * : * : * : * : * : * : * : * : * : * : * : * : * : * : * : * : * : * : * : * : * : * : * : * : * : * : * : * : * : * : * : * : * : * : * : * : * : * : * : * : * : * : * : * : * : * : * : * : * : * : * : * : * : * : * : * : * : * : * : * : * : * : * : * : * : * : * : * : * : * : * : * : * : * : * : * : * : * : * : * : * : * : * : * : * : * : * : * : * : * : * : * : * : * : * : * : * : * : * : * : * : * : * : * : * : * : * : * : * : * : * : * : * : * : * : * : * : * : * : * : * : * : * : * : * : * : * : * : * : * : * : * : * : * : * : * : * : * : * : * : * : * : * : * : * : * : * : * : * : * : * : * : * : * : * : * : * : * : * : * : * : * : * : * : * : * : * : * : * : * : * : * : * : * : * : * : * : * : * : * : * : * : * : * : * : * : * : * : * : * : * : * : * : * : * : * : * : * : * : * : * : * : * : * : * : * : * : * : * : * : * : * : * : * : * : * : * : * : * : * : * : * : * : * : * : * : * : * : * : * : * : * : * : * : * : * : * : * : * : * : * : * : * : * : * : * : * : * : * : * : * : * : * : * : * : * : * : * : * : * : * : * : * : * : * : * : * : * : * : * : * : * : * : * : * : * : * : * : * : * : * : * : * : * : * : * : * : * : * : * : * : * : * : * : * : * : * : * : * : * : * : * : * : * : * : * : * : * : * : * : * : * : * : * : * : * : * : * : * : * : * : * : * : * : * : * : * : * : * : * : * : * : * : * : * : * : * : * : * : * : * : * : * : * : * : * : * : * : * : * : * : * : * : * : * : * : * : * : * : * : * : * : * : * : * : * : * : * : * : * : * : * : * : * : * : * : * : * : * : * : * : * : * : * : * : * : * : * : * : * : * : * : * : * : * : * : * : * : * : * : * : * : * : * : * : * : * : * : * : * : * : * : * : * : * : * : * : * : * : * : * : * : * : * : * : * : * : * : * : * : * : * : * : * : * : * : * : * : * : * : * : * : * : * : * : * : * : * : * : * : * : * : * : * : * : * : * : * : * : * : * : * : * : * : * : * : * : * : * : * : * : * : * : * : * : * : * : * : * : * : * : * : * : * : * : * : * : * : * : * : * : * : * : * : * : * : * : * : * : * : * : * : * : * : * : * : * : * : * : * : * : * : * : * : * : * : * : * : * : * : * : * : * : * : * : * : * : * : * : * : * : * : * : * : * : * : * : * : * : * : * : * : * : * : * : * : * : * : * : * : * : * : * : * : * : * : * : * : * : * : * : * : * : * : * : * : * : * : * : * : * : * : * : * : * : * : * : * : * : * : * : * : * : * : * : * : * : * : * : * : * : * : * : * : * : * : * : * : * : * : * : * : * : * : * : * : * : * : * : * : * : * : * : * : * : * : * : * : * : * : * : * : * : * : * : * : * : * : * : * : * : * : * : * : * : * : * : * : * : * : * : * : * : * : * : * : * : * : * : * : * : * : * : * : * : * : * : * : * : * : * : * : * : * : * : * : * : * : * : * : * : * : * : * : * : * : * : * : * : * : * : * : * : * : * : * : * : * : * : * : * : * : * : * : * : * : * : * : * : * : * : * : * : * : * : * : * : * : * : * : * : * : * : * : * : * : * : * : * : * : * : * : * : * : * : * : * : * : * : * : * : * : * : * : * : * : * : * : * : * : * : * : * : * : * : * : * : * : * : * : * : * : * : * : * : * : * : * : * : * : * : * : * : * : * : * : * : * : * : * : * : * : * : * : * : * : * : * : * : * : * : * : * : * : * : * : * : * : * : * : * : * : * : * : * : * : * : * : * : * : * : * : * : * : * : * : * : * : * : * : * : * : * : * : * : * : * : * : * : * : * : * : * : * : * : * : * : * : * : * : * : * : * : * : * : * : * : * : * : * : * : * : * : * : * : * : * : * : * : * : * : * : * : * : * : * : * : * : * : * : * : * : * : * : * : * : * : * : * : * : * : * : * : * : * : * : * : * : * : * : * : * : * : * : * : * : * : * : * : * : * : * : * : * : * : * : * : * : * : * : * : * : * : * : * : * : * : * : * : * : * : * : * : * : * : * : * : * : * : * : * : * : * : * : * : * : * : * : * : * : * : * : * : * : * : * : * : * : * : * : * : * : * : * : * : * : * : * : * : * : * : * : * : * : * : * : * : * : * : * : * : * : * : * : * : * : * : * : * : * : * : * : * : * : * : * : * : * : * : * : * : * : * : * : * : * : * : * : * : * : * : * : * : * : * : * : * : * : * : * : * : * : * : * : * : * : * : * : * : * : * : * : * : * : * : * : * : * : * : * : * : * : * : * : * : * : * : * : * : * : * : * : * : * : * : * : * : * : * : * : * : * : * : * : * : * : * : * : * : * : * : * : * : * : * : * : * : * : * : * : * : * : * : * : * : * : * : * : * : * : * : * : * : * : * : * : * : * : * : * : * : * : * : * : * : * : * : * : * : * : * : * : * : * : * : * : * : * : * : * : * : * : * : * : * : * : * : * : * : * : * : * : * : * : * : * : * : * : * : * : * : * : * : * : * : * : * : * : * : * : * : * : * : * : * : * : * : * : * : * : * : * : * : * : * : * : * : * : * : * : * : * : * : * : * : * : * : * : * : * : * : * : * : * : * : * : * : * : * : * : * : * : * : * : * : * : * : * : * : * : * : * : * : * : * : * : * : * : * : * : * : * : * : * : * : * : * : * : * : * : * : * : * : * : * : * : * : * : * : * : * : * : * : * : * : * : * : * : * : * : * : * : * : * : * : * : * : * : * : * : * : * : * : * : * : * : * : * : * : * : * : * : * : * : * : * : * : * : * : * : * : * : * : * : * : * : * : * : * : * : * : * : * : * : * : * : * : * : * : * : * : * : * : * : * : * : * : * : * : * : * : * : * : * : * : * : * : * : * : * : * : * : * : * : * : * : * : * : * : * : * : * : * : * : * : * : * : * : * : * : * : * : * : * : * : * : * : * : * : * : * : * : * : * : * : * : * : * : * : * : * : * : * : * : * : * : * : * : * : * : * : * : * : * : * : * : * : * : * : * : * : * : * : * : * : * : * : * : * : * : * : * : * : * : * : * : * : * : * : * : * : * : * : * : * : * : * : * : * : * : * : * : * : * : * : * : * : * : * : * : * : * : * : * : * : * : * : * : * : * : * : * : * : * : * : * : * : * : * : * : * : * : * : * : * : * : * : * : * : * : * : * : * : * : * : * : * : * : * : * : * : * : * : * : * : * : * : * : * : * : * : * : * : * : * : * : * : * : * : * : * : * : * : * : * : * : * : * : * : * : * : * : * : * : * : * : * : * : * : * : * : * : * : * : * : * : * : * : * : * : * : * : * : * : * : * : * : * : * : * : * : * : * : * : * : * : * : * : * : * : * : * : * : * : * : * : * : * : * : * : * : * : * : * : * : * : * : * : * : * : * : * : * : * : * : * : * : * : * : * : * : * : * : * : * : * : * : * : * : * : * : * : * : * : * : * : * : * : * : * : * : * : * : * : * : * : * : * : * : * : * : * : * : * : * : * : * : * : * : * : * : * : * : * : * : * : * : * : * : * : * : * : * : * : * : * : * : * : * : * : * : * : * : * : * : * : * : * : * : * : * : * : * : * : * : * : * : * : * : * : * : * : * : * : * : * : * : * : * : * : * : * : * : * : * : * : * : * : * : * : * : * : * : * : * : * : * : * : * : * : * : * : * : * : * : * : * : * : * : * : * : * : * : * : * : * : * : * : * : * : * : * : * : * : * : * : * : * : * : * : * : * : * : * : * : * : * : * : * : * : * : * : * : * : * : * : * : * : * : * : * : * : * : * : * : * : * : * : * : * : * : * : * : * : * : * : * : * : * : * : * : * : * : * : * : * : * : * : * : * : * : * : * : * : * : * : * : * : * : * : * : * : * : * : * : * : * : * : * : * : * : * : * : * : * : * : * : * : * : * : * : * : * : * : * : * : * : * : * : * : * : * : * : * : * : * : * : * : * : * : * : * : * : * : * : * : * : * : * : * : * : * : * : * : * : * : * : * : * : * : * : * : * : * : * : * : * : * : * : * : * : * : * : * : * : * : * : * : * : * : * : * : * : * : * : * : * : * : * : * : * : * : * : * : * : * : * : * : * : * : * : * : * : * : * : * : * : * : * : * : * : * : * : * : * : * : * : * : * : * : * : * : * : * : * : * : * : * : * : * : * : * : * : * : * : * : * : * : * : * : * : * : * : * : * : * : * : * : * : * : * |                                                                                             |    |      |      |       |       |       |  |  |           |    |    |         |         |         |

## C) Sea anemone type 3 (BDS) potassium channel toxin family.

### C.1)

| PSI-BLAST             |                                                                                       |    |      |      |      |         |         |         |         |         |
|-----------------------|---------------------------------------------------------------------------------------|----|------|------|------|---------|---------|---------|---------|---------|
|                       |                                                                                       | aa | %I   | %I   | %I   | E-value | E-value | E-value | E-value | E-value |
| DeltaKappa-AITX-Avd4b | -----AAPCFC--PGKPDGRDLWILRGTCPPGGYGYTSNCKYKWP-NICCYPH--                               | 43 | 100  | 95.3 | 47.8 | 8e-06   | 2e-08   | 9e-07   | 7e-06   | 2e-08   |
| DeltaKappa-AITX-Avd4a | -----AAPCFC--SGKPGRDLWILRGTCPPGGYGYTSNCKYKWP-NICCYPH--                                | 43 | 95.3 | 100  | 47.8 | 1e-05   | 2e-08   | 1e-06   | 2e-05   | 5e-08   |
| PhcrTx2               | -----ALPCRC--EGKTEYGDKWIFHGGCPNDYGYNDRCFMKPGSVCCYPKYE                                 | 46 | 47.8 | 47.8 | 100  | 2e-05   | 5e-08   | 5e-10   | 1e-04   | 2e-03   |
| c30503_g2_i2          | MAAKSVLMMLAIFMALAFLANGEE---EVRVNVRAIRCNCIGKDGQPGYDWWFWRGSCPDGYGYKTSICMLGID-ICCFPRA-   | 43 | 43.5 | 45.7 | 39.6 | ----    | ----    | ----    | ----    | ----    |
| c30503_g2_i4          | MAAKSVLMMLAIFMALLLLANGEEAQGEVRIKARALLCNC--EGKASS--GDWWFWRGSCPDGYGYKTSICMLGID-ICCFPRA- | 44 | 47.7 | 47.7 | 43.5 | ----    | ----    | ----    | ----    | ----    |
| c30503_g2_i3          | MAAKSVLMMLAIFMALLLLANGEEAQGEVRIKARALLCNC--EGKASSGDWFWWRGSCPDGHGYTSSCSAGLGSICCLPKT-    | 45 | 48.9 | 48.9 | 47.8 | ----    | ----    | ----    | ----    | ----    |
| c30503_g2_i5          | MAAKSVLMMLAIFMALLLLANGEEAQGEVRIKARALLCNCCKEDNAPSGDWLWRRSSCPGGYGYTSSCNAGFGNICCLPRG-    | 47 | 52.1 | 46.8 | 37.5 | ----    | ----    | ----    | ----    | ----    |
| c22963_g1             | MAAKSVLMMLAICMALVFLTSGEEAQEDARVKPRAVSYCYGRYDKAPYGDWWFMRGSCPPGGYGYTSCQTGMN-VCCFPKA-    | 50 | 45.1 | 47.8 | 41.7 | ----    | ----    | ----    | ----    | ----    |
|                       | * * * * * * * * * * * * * * * * * * * * * * * * * * * * * * * *                       |    |      |      |      |         |         |         |         |         |

### C.2)

|                  |                                                  | aa | %I   | %I   | %I   | E-value | E-value | E-value | E-value | E-value | E-value |
|------------------|--------------------------------------------------|----|------|------|------|---------|---------|---------|---------|---------|---------|
| Kappa-AITX-Ael2a | -----GTTTCYCGKTIGIYWFGTK-TCPNSRNGYTGS            | 42 | 100  | 64.3 | 50.0 | 3e-10   | 2e-15   | 0.020   | 0.079   | 5e-03   | 0.58    |
| Pi-AITX-Ael2b    | -----GTATCSGNSKGIYWFYR-SCPTDRGYTGSCRYFLGTCTPAD-  | 42 | 64.3 | 100  | 45.2 | 1e-17   | 3e-15   | 1e-03   | 0.075   | 8e-06   | 0.031   |
| Pi-SHTX-Hcr5d    | -----GTPCDYGYTGVYWFMLS-RCPSGYGYNLSCHYFMGICCVKR-- | 41 | 50.0 | 45.2 | 100  | 1e-08   | 9e-09   | 1e-05   | 2e-05   | 3e-07   | 8e-05   |
| c29930_g1_i1     | MSYQRFLFLVVVASLIATSLAVPKDLE-----ERGTTCSCGN       | 42 | 81.0 | 71.4 | 52.4 | -----   | -----   | -----   | -----   | -----   | -----   |
| c29930_g1_i2     | MSYQRFLFLVVVASLIATSLAVPKDLE-----ERGTSCRCGS       | 42 | 66.7 | 66.7 | 52.4 | -----   | -----   | -----   | -----   | -----   | -----   |
| c13634_g1_i1     | MSYERLFLCLVMVAALVATSAVHSQVEVEK-DDKLQERAVSCL      | 43 | 37.2 | 37.2 | 44.2 | -----   | -----   | -----   | -----   | -----   | -----   |
| c13634_g1_i2     | MSYERLFLCLVMVAALVATSAVHSQVEVEK-DDKLQERAI         | 42 | 35.7 | 33.3 | 47.6 | -----   | -----   | -----   | -----   | -----   | -----   |
| c5043_g1         | MSYQRVLCVVAVGLIAFAVAFPKDAALMEDDMLMKRVSC          | 41 | 41.9 | 44.2 | 48.8 | -----   | -----   | -----   | -----   | -----   | -----   |
| c50300_g1        | MS-SRFLFLVVLTVLIAASMALDYDE---EKGFMVKRVG          | 40 | 37.2 | 34.9 | 42.9 | -----   | -----   | -----   | -----   | -----   | -----   |
|                  | * * * * *                                        |    |      |      |      |         |         |         |         |         |         |

[illegible][illegible][illegible]

[illegible]

### C) Nonclassical Kazal-type elastase inhibitor

### D) Turriptide LoI9.1

### E) Metalloprotease Inhibitor

### E.1)TIMP1

**c28108\_g1**  
TIMP\_DROME

-----MALLETAMVFLSVITMTSACSMPSPHQEHFCQAQFVVRGKVISGPGVQLPDKSLSSNVFGRFLAERVYTFRITKTYKGTAAIKKTGSLKVYGSRGRSFITKIHTPSK  
MDLRKHLGLLTLVLAVFAFYGRPADACSMPSPHQTHFAQADYVVQLRLVLRKSDTIEPGR-----TTYKVHIKRTYKATSEARR-----MLRDGR-----LSTPQD  
: \* . \*\* :.\*\*\*\*\* \*.\*\*::\*: :\*: . :\*: :.\*\*\*\*\*.\*\*\*.:: \*\* : \*\*..

**c28108\_g1**  
TIMP\_DROME

LNSCRVDLNVGKVVIYIAGYFGRKKLFVSGCNFRMEWKISKQKRSFGFARKYGRSCCNHQKCYEDCGKESQAMACNFDISTNPANECRDRYQYQLSSDG-----RRCSWTKNAL  
DAMCGINLDLGKVYIVAGRMP-----LNICSYKEYTRMTITERHGFSGGYAKATNCTVTPCFGERCFKGRNYADTCKWS--PFGKCETNYSACMPHKVQTVNGVISRCRWRRTQL  
\* ::::\*:::\*\* : :. \*: \*:::: .\* \*\*: \*:: :\*. \*: : :.: \* . . \* \* .\*. \*. \* . \*\* \* :.

**PSI-BLAST**

|                  | aa        | %I  | %S   | E-value |
|------------------|-----------|-----|------|---------|
| <b>c28108_g1</b> | YRKCMNKIP | 208 | 100  | 100     |
| TIMP_DROME       | YRKCMSNP- | 184 | 29.5 | 56.2    |
|                  | *****:    |     |      | 2e-20   |

### E.2)TIMP4

[illegible][illegible]

|              |                             | aa  | %I   | %S   | PSI-BLAST<br>E-value |
|--------------|-----------------------------|-----|------|------|----------------------|
| TIMP4_HUMAN  | HLPLRKEFVDIVQP----          | 195 | 26.2 | 52.4 | 6e-13                |
| c29197_g1_i1 | GRGYRE <b>C</b> IKDATILGFYK | 206 | 100  | 100  |                      |
|              | *: * *                      |     |      |      |                      |

### E.3)TIMP-LIKE

[illegible]

|                  |                                                                                                                    | aa  | %I   | PSI-BLAST<br>E-value |
|------------------|--------------------------------------------------------------------------------------------------------------------|-----|------|----------------------|
| XP_020895880.1   | --SNKDY LISGHFWN----NKIRNSL CNSWNVEWSSVKQSFKDFTPKLKT C P C G V G C L L P L Q A L V A L A I I T C I I N Y F         | 155 | 100  |                      |
| <b>c26215_g1</b> | RLHQQS FVLSGVS VDRREGONRMESES C QDWHSSSEEVTT SYKDI F P M L N T C K C A A N T N Y V G R F F L L S M L L T A W N M N | 161 | 30.4 | 7e-24                |
|                  | .....*.....*.....*.....*.....*.....*.....*.....*.....*.....*.....*.....*                                           |     |      |                      |

### F) Serpin

```

ILEU_XENTR-----MENLSSACTHFSFDLFRKI---NENNTAGNVFFSPISISTALAMVLLGARGNTAQQISRIHLHFDPAVK--DLHSNFQTLNABEINKKNVSSYALNLNANLRFGEKSKFPLPDFLSSVKKQYNADLGTVDIFSA
ILEU_XENLA-----MENLSSACTHFCFDLFPKKI---NENNSTGNLFFSPISLSTALAMVFLGTGKTAEQMSKTLHFDPAVK--DLHSNFQTLNABEINKKDVSTYALNLNANLRFGEKTFNPLPNFLSSVKKQYSADLGTVDIFSA
c25417_g1      MKLIITALKIAVVLLESEAFLCQGDEHDPESKTIKELVHSSNEFAFRLNLFGLTQNEKSKNENLFFSPSTISIALAMVFLGSRGNTAQISDALGVMYENGBEILHTAFKTLHEAHINSEDEVFLKLANRIGHWSDLHFLFVSSAMKEFTTLVDVFGK
c26903_g1      -----MSAVATAVNQFADVLHVLKLS--QEKFLGDNLFYSPTSLSIALGMVYSGARGSTAEQIANGFHWKSLEVEKLNESMSKFSDALTSSTASNELNANRLFLQQGFVEIQEFTDCCKKFYDAETALVDYKDK
c27265_g1      MYIIVLNTFRSRSLILTVSLVVVASISPSTMAQADIKASSNKFSKLKHQVLRG--QAS--SAENLFIYSPSSIILVALMTHLIGARGNTAKQMSKSFHLEEIPEKQLNEEFQKFLQSLNQSNARGNEIAMANRLFVQMGEFVSKQFQEESEKFFNAEALVDYQKN

```

```

ILEU_XENTR      AEDARKEINTWVSEQTKGKIPEVLSAGAVNSF1KLVLVNAIYFKGDWAKKFKAETHTKDMPFQL---NKKEQKTVMKMYQMEKLFPNYIPEINCRVLLELPYVDYELSMVIVLDPNINDDTTGLQOLEKELSLEKIH---EWTENMMPIDVHVHLPKFKLEDYSK
ILEU_XENLA      LEDARKEINKVWSQETKGKIPLEVSTGTVDSTRKTLVNAIYFKGDWAKFNETHHTDMPFQL---NKKEQKTVMKMYQMEKLFPNYIPDINCRIELPVPDYVELSMI1ILPDNINDTTGLQOLEKELSLEKIH---EWTENMMPIDVHIIHLPKFKLEDYSK
c25417_g1       SDEVKRDNQNVHQQTQNGKIRDFPLHGVLNSATKLALINAIFYGWAKNFDEKETHTHAPFYASGNREYKMEVNMMQTKSKNKYIFDQEHSCHVLELPYSGNELSMVLVLPBEELD---GISLKESLDLENLD---RWMTLMVNTVSVSLSPRFKLNQQVDY
c26903_g1       FEGARKLINTWVEEKTDKDIKELLPSSGSLNSLTRATLVNAIYFKGIWEKQFEKAHYDSFTFFT---SLNKEMKIMMFQKSFKFL EARNLDCQLLEMPYTGGDLMSVILLPNEIE---GLSKLEEKLTYDALQGALTSVTKARPLEVEVSI PKFSMTRQFE
c27265_g1       SKGAREENVKNVVEEKTNNKIKDLPIEGMGFDPTRLITLVNAIYFKGSWMSGFDPNATQGTGFQL---TSSQSIEVPMMYQSKFKFYFENQDLCKCMLELPYAGEKMSMI1LLPDVE---GLSKLEESLSYKSLDDGINHLRMAREEEVEVTLPKFKLSEKFS

```

|            |                                                                                                                            |     | PSI-BLAST |      |       |         |         |         |
|------------|----------------------------------------------------------------------------------------------------------------------------|-----|-----------|------|-------|---------|---------|---------|
|            |                                                                                                                            |     | aa        | %I   | %I    | E-value | E-value | E-value |
| ILEU_XENTR | LKSQLAGMGMDLFEAGSADLSGMSG--NDLYLSEVIHKSFVEVNEEGTEAAAAA--AGIAMMCLMRE--EefnanHPFLFFIRHNATKSILFFGRYSSP-----                   | 377 | 100       | 88.3 | 5e-95 | 2e-91   | 1e-90   |         |
| ILEU_XENLA | LKSQVLGAMGMVDLFNSGSADLSGMSG--NNLFLSEVIHKSFVEVNEEGTEAAAAA--AGIAMMCMRE--EefnadHPFLFLIRHNATKSILFFGRYSSP-----                  | 377 | 88.3      | 100  | 8e-91 | 2e-88   | 7e-93   |         |
| c25417_g1  | LKNVLPLQLGIQIDFDASKADLSGITES--SGLFVSNVIHKAHVDVNERGTEAAAAAT--GVTMMKRSLDLNEVFHADHPFIFFIRHHFSGSILFVGKVMQPSGLTEESDLPQRTVADEL   | 409 | 41.3      | 38.4 | ----- | -----   | -----   |         |
| c26903_g1  | LKEILQRMGMDGMDFDQVESNFTGLIKGPGKLYVSEVFHKAFVDVNEEGTEAAAAATAAVMMTRMMVRPPPSFTADHPFLFLIRHCKSDAILFLGRVAKPESKE-----              | 387 | 40.9      | 39.9 | ----- | -----   | -----   |         |
| c27265_g1  | LKEVLKMGASDLFNPSKADLTGINKD--GQLFVSEVVKAFVDVNEEGTEAAAAAT--AVGVALCMCPMNPFIFFADHPFLFLIRHNESGVILFLGLRANPN-----                 | 381 | 41.0      | 42.1 | ----- | -----   | -----   |         |
|            | ** * * * * : : : : : * : : : : * : : : : * : : : : * : : : : * : : : : * : : : : * : : : : * : : : : * : : : : * : : : : * |     |           |      |       |         |         |         |

### G) Reversion-inducing cysteine-rich protein with Kazal motifs

[illegible]

### H) A.superbus venom factor 1

[illegible]









### C) Venom metalloproteinase (M12B) family

```
VM3E2_ECHOC --MMQVLLVTICLAVFFPYQGSSI ILESGNVNDYEVYPQKVLTALPIEAILOPE--QKYEDAMQYEFVNGEPVVLHLEKNKLNFTKDYSETHYSPDGREITT-KPLIED
VM3_BUNMU    --MIQALLVTICLAVFPYQGSSII ILESGNVNDYEVVYPQKVPLLPKGGVQNPPKTKYEEDTVQYEFVNGEPVVLHLERNKGLFSEDYTEAHYAPDGREITT-RPPVQD
c29916_g1    MFSLTLCVVLWCCVLTITNGETHRPLSEYIKIYETLS-YTSALTQKHDRHRSLNPKSSPILLNFIEAHRKFIRLRRHASIFSDDFVADNTFEFDTSKVVGEVEVLGHK
              : * : . : * :      : * : * :      : * :      : * : * :      : * : * :      : * : * :      : * : * :
```

VM3E2\_ECHOC HCYYHGRIGN---DAHSTASISACNLGKGHFKLQGETYLIEPLKIPDSEAHAVYKYENIEKEDEALKMCGVKHTNWESEDIPEAKSOLFATSEQHRFR-----E  
VM3\_BUNMU HCYYHYGIQN---EADSSAITSACDLGKGFKHQGETYFIEPLKLSDSAHAIIYKDENVEEENETPKICGLTETTWESEDIPIRNASLLIYTPEQNRYLKV-----K  
**c29916\_g1** KSLVHGFIISDGIFEGEKIHAGNDEFHVHEPSHKIFYQGKQLFHSVIFKSDEDVQYPHEHGSGCGMRDKTKRWMEKVHAS-EIKEPKMQFOHSNYEPVLHRYRRAASQDPDPDK  
. \* . \* . \* : . \* . \* . \* : . \* . \* . \* : . \* . \* . \*

```

VM3E2_ECHOC      RYIEFFIVVDQRMYNKHHN--DSAAIRTWIFEMLNTVNEIYLPWNIH-----VPLVGLFWTQGDLINNVSSADKTLDSFGGEWRRRDLLNRKAHDN----AHLITAMH
VM3_BUNMU        KYIEFVAVDNRMYRHYKR--NKPIIKRRVVELVNILNTILRRLNPH-----TALIGLEIWSRKDKINVQSDVKATLKSFGKWREKKLLPRKRNDN----AQLLTRID
c29916_g1        KSCRLLMQADHLFTEHVGQGNKERALLKMTHEHVQAINTIYPGIKFFGKAESDKIEFVIARMLANGSAEQSEASNPFSSANIGVEKLELLNSQQGRNKGICYLGYIFTYRD
:  . . . . . * . . . . . :      :      :      * *      :      :      :      :      :      :      :      :      :      :

```

```

VM3E2_ECHOC   FDAQTLGLAYTGSMLCPFKYSTGVFQDSSEINIFVAI-----TLAHELGHNLGISHDVP-SCT-CQTKA----CIMSPYLDQPTKLFNSNCSEIQK
VM3_BUNMU     FNGNTVGLAALGSLCSVKYSVAVIQDYSKRTSMVAS-----TMAHEMGHNLGINHDRA-SCTSCGSNK----CIMATKRT-KPASRFSSCSVREK
c29916_g1     FNDGVLGLAWGVSPTDAGGICEKERTYSDGTKILNTGVVTFINYGKAVPQRVSEITFAHEVGHNFGSPHDTSGECPTGGSDGNYIMFARATEGSKPNNRKFFSPCSIKKA
*:  . . . . . **          * : . . . : :          * : . . . : :          * : . . . : :          * : . . . : :          * : . . . : :

```

[illegible][illegible]

|                  |                                                                                                        | aa  | %I         | %S         | PSI-BLAST<br>E-value |
|------------------|--------------------------------------------------------------------------------------------------------|-----|------------|------------|----------------------|
| VM3E2_ECHOC      | -----YKSGFDYISCLPCYRANEEDKGMVDEGTCGEGKVCNSNGYCVDLNVAY-----                                             | 419 | 19.1       | 43.7       | 1e-12                |
| VM3_BUNMU        | -----KRNSG---VCNCLILPDDPNYGMVETGTCKGDGMVCSDRCKVKLQTVY-----                                             | 426 | 22.9       | 43.2       | 5e-21                |
| <b>c29916_g1</b> | <b>LAWIKKYWVAVLMGVALILLMAAFIKLCSVHTPSSNPNNKKPARQLTLRRQHLQEEFNRRARQARDTEGYGPSYGDPPPPYPGRGMEMQGGRYHR</b> | 556 | <b>100</b> | <b>100</b> |                      |
|                  | . * . . . : : : * : : : : :                                                                            |     |            |            |                      |

#### D) Endothelin-converting enzyme 2. Peptidase M13 family

```
c30734_g1_i2      -----MSNELPSETTHVPLLKYEDQDSLVG-----FS-GSREGMAD-SDSLEGHIIIVVKPSS-----DNYLVRIIKKPTFWL---AVLIFILLFTCIILGALL
ECE2_HUMAN        MNVALQELGAGSNMVEYKRATLRDEADPETPVGGASPDAMEVGKGASPFSPGPSPMGTPGTPRSSGLFWRVTCPHLRSISGLCSRTVMVGFGKQTROLLGSRTQLLEVLVLAGASLLLAALL
```

c30734\_g1\_i2 SRSKKEYKSLVLKE--DSVCLSEGLSDSAHYMLHAIDPKANPCEDFFQYSCGGWIKNHPDPSQAFWGTFTSSLWDNDNMKEMKRLLTDPAIKNSSSSTIKLAKTFYDSCMNMDEINKQGAQ  
ECE2\_HUMAN LGCLVALGVQYHRDPHSHTCLTETACIRVAGKILLESLDRGVSPCEDFYQFSCGGWIRRNPLPDGRSRWNTFSLWDQNQAILKHLEN--TTFNSSSEAEQKTRQRYFLSCLOVERIEELGAQ  
\* \* \* \* \*  
\* \* \* \* \*

[illegible]

c30734\_g1\_i2 MQIAKIFVPPNNRSQIDQMYSRKMSIKDLGNICPEIPWLDFFQETFKGSATIQDSENVVVMMATDYLVLSPIKKAGAKLLNDYVMVQIVRNSVGSLSRPFREAAHNLQKVLEGVSPQEE-  
ECE2\_HUMAN IQLANITVPQDQRDEEKIYHKMSISELQALAPSMDWLEFLSFLLS-PLELSDSEPVVVGYMDYLQQVSELINRTESPLNLYLIWNVLVQKTSSLDRRFESAQEKLLETLYGTTKSCVP  
:.\*:.\* \*\* :.: :.:\*\*\*\*\* \* :.\* :\*\*\*: \*\*\*\* \*\* :\*\*\* :\* :\*: \*\*\*\*\*:\*\*\*\* \*: \* \* \*

[illegible]

c30734\_g1\_i2 KGVNKNKWLMPQTVNAYYSPSRNQIVFPAGILQAPYYDKRYPKYCNYGSIGGAVGH<sup>ELVH</sup>GFDNSGRMYDKNNGFVGQWWTNKSVEGFQVKADCLIKQYNQYSSYGKHEKGKFTLGENI  
ECE2\_HUMAN KPSPRDQWSMTPTQTVNAYYLPTKNEIVFPAGILQAPFYARNHPKALNFGGIGVVMGH<sup>ELTH</sup>AFFDDQGREYDKEGNL-RPWQNESLAAFNRHTACMEEQYNQYQVNGERLNGRQTLENI  
\* .:::\* \*\*\*\*\* \*:>::\*\*\*\*\*:\* :::\*\* \*::\*\* :.\*\*\*\*\*.\*:.\* \*\* \*\*::: \*\* \*\*:.\*.:\*: :.\*\*\*\*\*. \*:>::\*: \*\*\*\*\*

|              |                                                                                                      | aa  | %I   | PSI-BLAST<br>E-value |
|--------------|------------------------------------------------------------------------------------------------------|-----|------|----------------------|
| c30734_g1_i2 | ADNGGLKAAYLAYQHVVKQNGQEKLPVLGKTNEQLFFIAYGQSWCASIRPEKARAMLEIDPHSPNKFRLVLTLSNLKEFAKAFNCPLGSMNPNPKKCVI  | 781 | 100  |                      |
| ECE2_HUMAN   | ADNGGLKAAYNAYKAWLRKHGEEQLPAVGLTNHQLFFVGFAQVWCVSRTPESSHEGLVTDPHSPARFRLVLTLSNSRDLFRHFGCPVGSMPNPGQLCEVW | 811 | 40.1 | 0.0                  |
|              | ***** *: :*:*:*: *: *: * *:***** :*: * *: *: * ***** :***** :*: *: * *: * *: * *: *                  |     |      |                      |

### E) Peptidase M14 family

### E.1) Carboxypeptidase A2

CBPA2\_HUMAN -MAMRLILFFGALFGHIYCLETFVGDQVLEIVPSNEEQIKNLLQLEAQEHLQLDFWKSPTTPGETAHVRVPFVNQAVKVFLESQGIAYSIMIEDVQVLLDKENEMLFNRRRERSGNFNFGA  
c31568\_g1 MTALKLAVAVVMTVVAIGYGKGYS GDKILRIIPTSRQH IKMLTKLEE QPMKLDFWKYPDNVGK PVDIHVSQDSDFANFTSIMQS IGMKF KILAADLQVLMDQQND--IVHYADEHSN--WYVH

\*::: . . \* .. \*\*::\*.\*\*.:...:\*\*\* \* \*\*: : :\*\*\*\*\* \* . \*:.....: \* :. . :\*: \*::: \*::\*:\*\*\*\*:\*\*\*: :. : \*:\* :

CBPA2\_HUMAN YHTELEISQEMDNLVAEHPGLVSKVNIGSSFENRPMNVLFKS--TGGDKPAIWLDAIGHAREWVWTQATALWTANKIVSDYGDPSITSILDALDIFLLVTPNDPGYVFSQTKNRMWRKTRSKV  
c31568\_g1 YHPLDEIKAKINNLSVQAGDRAELIPIGKSFKEKRDQLAVKIKGAPQNNKPVLFINCGIHAREWVGVPATCVYMLDQLVNEYKNDTVKATLDKIDFIIPLVLPNDPGYVYSWTKDRMWRKNRKPT  
\*\*.\*:\*\*.:::\*\*\*: . . . : \*\*.\*:\*\* .\*: . .\*::::\*\*\*\*\* \*\*::: :\*:.\*:\*\* :\*: \*\* :\*:\*\*\* \*\*\*\*\* \* \*\*:\*\*\*.\*. .

[illegible]

|             |                                                                     | aa  | %I   | PSI-BLAST<br>E-value |
|-------------|---------------------------------------------------------------------|-----|------|----------------------|
| CBPA2_HUMAN | SIDWSY-DYGIKYSFAFELRDTGRYGFLPARQILPTAEETWGLKAIMHEVRDHPY             | 305 | 100  | 5e-97                |
| c31568_g1   | TKDXYTGALHIKYSYVLELRDKDGKGFLLPQSQILPTAMETFAGIKAMVASMDLTQE           | 269 | 38.2 |                      |
|             | : *::*        *****.:*****        *****        ***** **:: *::*: : : |     |      |                      |

### E.2) Carboxypeptidase A4

CBPA4\_HUMAN -----MRWILFIGALIGSSICGQEKFFGDQVLRINVRNGDEISKLS-QLVNSNNLKLNFWKSPSSFNRNRPVDVLVPVSLSLQAFKSFRLSQGLEAYVTI  
c27510\_g1 MARGIGHLIKTVVVLMISQSSVGRRKTYIGDRILRVTPKTEVDLKFNLGLVDDKNYELDFWTFPTFVARSDVHVSRSKCNQFERLLQLKNITFEVRL

:    ::   :   \*\*:   ::::\*\*::\*:   .   .   .   .   \*   :   .   :   \*   :   \*\*   .   \*   .   \*   \*\*\*   \*   .   .   :   \*   :   \*:   ::   :   \*   :

[illegible][illegible]

CBPA4\_HUMAN SVVDFIQKHGN-FKGFIDLHSYSQLLMPYGYSVKKAPDAEELDKVARLAAKALASVSGTEYQVGPTCTTVYPASGSSIDWAYDN-GIKFAFTFELR--D  
c27510\_g1 NLAKFLFSRRKRIRGYVDFHSYGQLWMSPWGYKRFPPNYRKQALAMNKVKVKAIKHVGHTEFTYGPSSIMIYPTSGDATDWTFGVLGVTHSYGVELRPSL  
...\*: .: : ::\*:\*\*\*\*\* \* \*:\*. : .\*: .: . . .\*\* : \* \*\*\*: \*\*: .:\*\*\*\*\*: :\*: .\*: .\*\*\*

|             |                                       | aa  | %I   | %S   | PSI-BLAST<br>E-value |
|-------------|---------------------------------------|-----|------|------|----------------------|
| CBPA4_HUMAN | TGTYGFLLPANQIIPTAEETWLGLKTIMEHVRDNL   | 308 | 100  | 100  | 8e-86                |
| c27510_g1   | MDLYGFLVPPSYITPVGKETFOGLKALAEVL----   | 343 | 29.7 | 58.3 |                      |
|             | . * * * * * . * * . : : * : * * : * : |     |      |      |                      |



### A) Retinoid-inducible serine carboxypeptidase, peptidase S10 family

[illegible]

### B) PC3-like endoprotease variant B. Peptidase S8 family. Furin subfamily

[illegible]

**Figure S5) Serine Peptidases.** The sequences used in the alignment in A) and B) correspond to Retinoid-inducible serine carboxypeptidase (Uniprot: Q9HB40, RISC\_HUMAN) from *Homo sapiens* and to PC3-like endoprotease variant B (Uniprot: P29145, NECB\_HYDVU) from *Hydra vulgaris*, respectively.

### A) Beta-hexosaminidase subunit beta

```
HEXB_HUMAN -MELCGLGLPRPPMLLALLLLAFLLAAMLALLTQVALVVQVAEAAARAPSVSAKPGPALWPLPLSVKMTPNLLHLAPENFYISHSPNSTAGPSCITLLEEAFFRRYHG YIFGFYKWHHPAEFQ  
c30952_g1 MAELCNTLL-----VIFGLFCFALPSSTTKPSLSDDLNLQRYGGKKQILAE DYVKGIWPKPQQQTPTGVKFSLLPKSFSFS-----IKGKTSDVLTDVAKRYMKLT-----PD SGVT
```

[illegible][illegible]

HEXB\_HUMAN EFKWCWSPNKIQDFMRQKGFQIDFKKLESFYIQKVLDIATINKGSIVWQEVFDDKAKLAPGTIVEVWKDSAYPEELSRVTASGFPVILSAPWYLDLISYQDWRKYYKVEPLDFGGTQK  
c30952\_g1 SDFCDKSNPNITAWMKQKHGMGSNYSLLEQYYEQKLLNIIVGGLKKQYIIWQEVVDNNVVLPLPTVVNVWKG-GWQAEALAKVTKLGLTKLSSCWYLDGSIYGLDWNKYYQCEPNTFTGSDA  
\* \* \* \* \*  
\* \* \* \* \*

|            |                                                                                                                                                                                          | PSI-BLAST |      |         |
|------------|------------------------------------------------------------------------------------------------------------------------------------------------------------------------------------------|-----------|------|---------|
|            |                                                                                                                                                                                          | aa        | %I   | E-value |
| HEXB_HUMAN | QKQLFIGGEACLWGEYVDATNLTPRLWPRAVGERLWSSKDVRDMDDAYDRLTRHRCRMVERGIAAQ-PLYAGYCNHENM----                                                                                                      | 435       | 100  | 1e-167  |
| c30952_g1  | <u>QKELVMGGTGCMWGEWVDGNTILPRTWPRALAIARLWSSKATTDLGDATNRIWEQRCRYLRGIPAEHAVQSKYCRHEWPAD</u><br>***. ** .*****. ** ** ** ** ** ** ** ** . ** .*****. - .*. ** .*. .****. . ****. . . . ** ** | 441       | 51.7 |         |

### B) Beta-hexosaminidase

[illegible][illegible][illegible]

c30078\_g1\_i1 LDVGRNFMPKSAVLRLLDVMATYKMNKFHFLHTDDEGWRLEIPDLPELTQIGSKRCYDPDTGLKCIQTDLGSGPDEPTSR-T-YTVNEYKEILQYANDRHIQVIPFDFMPGHGYAAVKSM  
HEX\_VIBVL MDVSRNFHSKELVFRLFDDMAAYKMKNKFHFLADDEGWRLEINGLPFLTQVGARCHDHVEQNCKMMPQLGSGAELPNNGSGYYTREDYEILAYSARNIQVIPSMDFPHSLAIAVKSM

\*.\*.\*.\*.\* \* .\*.\*\*\* \*\*.....\*\*\*\*\* \*\*\*\*\*:\*.\*.\* \* \*.\*\*.:\*\*\*\* \*: :\*: .....\* ..\*

[illegible][illegible][illegible]

|              |                                                                                            | aa  | %I   | PSI-BLAST<br>E-value |
|--------------|--------------------------------------------------------------------------------------------|-----|------|----------------------|
| c30078_g1_i1 | KSSGDKILTKTAIPGLTVQYSDDNGQTRDIPDKVHGKVKLATRSADGRRISRSVEYQGSTIKSSSSIPSAIQCLVFISVISYLFISKVDF | 862 | 100  |                      |
| HEX_VIBVL    | VIKNNILDVVTEFHGVAIQYSLD-GKTWHKYDDTKK-----PQVSTKALVRSVSTNGRTGRAVEVLAK-----                  | 847 | 37.4 | 2e-178               |



**Figure S6) Glycoside Hydrolase Family 20.** The sequences used in the alignment in A) and B) correspond to Beta-hexosaminidase subunit beta (Uniprot: P07686, HEXB\_HUMAN) from *Homo sapiens* and to Beta-hexosaminidase (Uniprot: Q04786, HEX\_VIBVL) from *Vibrio vulnificus*, respectively.

#### A) PLA<sub>2</sub>

|               |                                                                                                                       |                        |            |
|---------------|-----------------------------------------------------------------------------------------------------------------------|------------------------|------------|
| A2-AITX-Ucs2a | ---MKNN--IILVILLGI-----SVFVDCPLPN-DQEEDKSLNAQSEVSAVQKRDIQFSGMIRCATGRSAWKYFNNGWCGWGGSGTAVDGVDSCCRSHDWCYKRHDS           | CYPKIIPYIASTSGS----    | HPSCSITC-- |
| c54261_g1_i1  | MMMKKKSTTTLIVLLGM-----AFLVEGLSLN-NLEDDKRMNVKTGDGRAE-KRNLWQFGNMIKCATGRDAGDNGYGNVCGWGGSGVPVDGVDRCCQAHDRCYDNHDS          | CNPKTNYYSYKSGK----     | HPSCTISC   |
| c18858_g1_i1  | ---MFFK--TILLVIVAA-----FLLTEIQGKRRNIKADESTKAVR---PAVMKRNLVQFGIMVYCMTGRFALDYNNGYCNVGGSGTPVDGLDRCCKVHDDCYGRYEN          | CSPYYISYVYRTGW----     | HPTCSLT    |
| c28522_g1     | ---MKGAAALLWMLVFAAASLQFVFSMEEEDESIDQLHKVESDSDLQDEQSPVQKRNLIQFADMVRCATRRNPFYDNDYGNWCGVGGRGIPKDGVDRCRAHDKCYERYHGC       | CNPKWRTFRYRAKKRRRRFRSR | CRITCK-    |
|               | *        : : : : .        . :        . : : .        . * : : * : * * . . * . * : * : * : * : * : * : * : * : * : * : * |                        |            |

  

|               |                                             | aa  | %I   | E-value | E-value | E-value |
|---------------|---------------------------------------------|-----|------|---------|---------|---------|
| A2-AITX-Ucs2a | HSANNRCQRDVCNCDKVAACEFARNTYHPNNKH-----      | 111 | 100  | 1.1e-57 | 3.4e-39 | 1e-35   |
| c54261_g1_i1  | STQNDQCERNVCSCKVAACEFARNNNYNNANKH-----      | 117 | 59.0 | -----   | -----   | -----   |
| c18858_g1_i1  | --DTDACKKAVCTCDKEAAECFARHKYNSKNNNSWFLWFRK   | 139 | 40.7 | -----   | -----   | -----   |
| c28522_g1     | -NKWGSCEGRAVCECDRVCLALCFARNRYHRKYKKK--SWWR- | 204 | 40.1 | -----   | -----   | -----   |
|               | . * : * * * : . * * : * : * : *             |     |      |         |         |         |

#### B) PLA<sub>2</sub> / Group I

|               |                                                                                   |                                                      |                             |
|---------------|-----------------------------------------------------------------------------------|------------------------------------------------------|-----------------------------|
| c25131_g1_i1  | -MTVKRLVKTVILLCFVLLAVAG-----HTDSRRSKRSIAQLTTMIACATKN-NWVYYSNYG                    | CYCGPGGKGPVDEIDRCQKHDMCYGRIMSSWK                     | CMLS-LEVYFLSYEVTGCYNCKPS-N  |
| c3686_g1_i1   | MGALKLLVLLAVVACVACTSLDLGKLKKKSLKALKTQVHTRARRSLYEFYKMITCETGR-SWQDYNLYG             | CFCKGKGTTGTPVDALDQCCFDDHDECYSQAAAS-VCPWP-LQIYLDYWHKN | CSECDAKSN                   |
| PA2AD_NAJSP   | -----MNPALLLILAAVCVSPLG-----ASSNRPMPLNLYQFKNMIQCTVPNRSWWDFADYGC                   | CYCGRGGSGTPVDLDLRCQVHDNCYGEAEKISR                    | CWPY-FKTSYSECQSG-TLTCCKGG-N |
| A2-HRTX-Apt1a | -MQLYTY-FFTFSLVLILALADQENKSLDFTQEGGIA-----KRGAFQFSYLKIKYTGR-NPLDYWGYG             | CGGLGGKGTTPVDGVDWCCYHDMCFNSITQGP                     | RPTCSKNAPYHKNYFSGLK         |
| c513_g1_i1    | -MGFLKLCFLVVLNLSLSQAAFISAADYEQDSGLSRGSYRSKRNLIQFARMITCATGR-DWSDYNEYG              | CWCGYGGSGRPVDGTDRCQIHDRCYDSVVASNV                    | CTIGQLQIYETIYTRVNC          |
|               | .        . : : *        . . . :        * : * : * * * * * * * * * * * : .        * |                                                      |                             |

  

|               |                                             | aa  | %I   | %I   | E-value | E-value | E-value |
|---------------|---------------------------------------------|-----|------|------|---------|---------|---------|
| c25131_g1_i1  | SPCALAICCKDSSLSKCLKNKPLHK-RYKLYDQTKCSHNFLGS | 124 | 37.0 | 33.1 | -----   | -----   | -----   |
| c3686_g1_i1   | SACEQALCECDKAARCFKNNKWDP-QYDDYPQEKCA-----   | 118 | 41.9 | 34.7 | -----   | -----   | -----   |
| PA2AD_NAJSP   | DACAAAVCDCLRLAICFAGAPYDNNYNIIDLKARCQ-----   | 119 | 100  | 37.8 | 1e-23   | 3e-20   | 5e-19   |
| A2-HRTX-Apt1a | SKCGRAICACDIAAVKCFMRNHFNKYNKYKN-IC-----     | 119 | 37.8 | 100  | 2e-15   | 1e-19   | 2e-27   |
| c513_g1_i1    | NRCEQAICSCD SHAVRCFRNRNYSRYANYNKQRLCNYN---- | 116 | 35.2 | 37.4 | -----   | -----   | -----   |
|               | . * * : * * * * : * .        . :        *   |     |      |      |         |         |         |

#### C) PLA<sub>2</sub> / Group III

|             |                                                                                                    |                         |
|-------------|----------------------------------------------------------------------------------------------------|-------------------------|
| c26312_g1   | MDSYVSKIFVILAVILHASLCQAMYDWKTKTFRKDNSKLVVPGTKWCGKGNNAASFDDLGEHRETDLCREHDCPTIYILFPORRFGILNLYPSHLSL  | CCEMKLYNCLWNVTSHVAVAV   |
| PA23_HELSEU | -----GAFIMPGLTWCGAGNAASDYSQLGTEKDTDMCCRDHDCENWISALEYKHGMRYNPSTISHCD                                | CNDNQFRSCLMKLKDGTADYV   |
| PA2_XYLAI   | MHALRSSVLALWLCLHVSRAWMTYRSANGLDEYEPEDRIIFVGTKWCGNGNVAEGPEDLGLSKETDACCREDHDCPDLEIAGQSKHGLTNTASYTRLN | CACDEKFYNCLKNSSETGSGAV  |
|             | . : : . * * * * * . : * : * : * : * * . : : * : .                                                  | * * : : . * * : . . : * |

  

|             |                                                                             | aa  | %I   | %S   | PSI-BLAST<br>E-value |
|-------------|-----------------------------------------------------------------------------|-----|------|------|----------------------|
| c26312_g1   | GRMYFNVLVRVPCFHLVEKKVCCKERSFDWWKFKYVCKKYGVVEVKQTGFMPKRFHKQLQVQPSNWNATANGTMT | 159 | 100  | 100  |                      |
| PA23_HELSEU | GQTYFNVLKIPCFELEEGEGCVD-----WNFWLECTESKIMPVAKLVSAAPYQAQAEQSGEGR-----        | 143 | 34.4 | 61.9 | 1e-30                |
| PA2_XYLAI   | RFTYFTLLGTMCYRNEHPLICVK-----KGWFSCKSYELDQS-----QPKRYQWFDVSSNFAFPRMLT----    | 140 | 33.3 | 54.1 | 2e-21                |
|             | * : * : * : . * . :        * : : . : : . : * * * * * . : : * * * * : * *    |     |      |      |                      |

#### D) PLA<sub>2</sub> / Group IX

|                  |                                                                                     |              |              |              |     |
|------------------|-------------------------------------------------------------------------------------|--------------|--------------|--------------|-----|
| c23289_g1        | -----MR--DPMLRVYLLLLMI-----HHTTAHQCR--VQVNGCSIPGNLPFLYKKKFTPA                       | CNKHDVCYS    | CGQYYHWSRKS  | CDVSFQNDMYYL | CTL |
| X2G7F0_9CNID     | -----MQTYKGAILVFVTLGCF-----IGGVLSTCPADVHVNGCSIPLNAPFPYKELFKPV                       | CNRHDVCYI    | CGNRYGWTREI  | CDVAFKRDMEQK | CTD |
| c38288_g1        | -----MLPRMLLTRTISFTEFLIVLMFGFYSCSWCHTNSTROCAADGYSNGCSVPLGMEAPYKASFTPA               | CNKHDICYG    | CGHHYNWTRDL  | CDDAFLADMKNT | CKN |
| A0A2B4RAB8_STYPI | -----MGNSVSLTIAWLLLSMS-----WQVISAGSDCTIQTNCGSVPLGLKAPYQITLTPA                       | CVKHDVCY     | CGELYRWNQEQ  | CDKAFKRDYKLC | ER  |
| COMA_CONMA       | -----XQPSTAECLKINSNACSVPFSSX-IPQKXFLAACDRHDTCHYCGKHFGFKQDD                          | CDAFFRDMTALC |              |              |     |
| A7T072_NEMVE     | MARVTSTKQYKNGMFSRYNGITPWNFEGIMSPVLVIFVIALPLSALASEGVTVDLQDQVCPFESNGCSVPGLPMLYKRLFTPA | CHMDHVCY     | RCNKVHDWEKID | CDTKFWENMYFL | CEG |
|                  | * : * : * : : : . * * * * * . : : * * * * : * *                                     |              |              |              |     |

|                  |                                                                                            | PSI-BLAST |      |      |         |         |
|------------------|--------------------------------------------------------------------------------------------|-----------|------|------|---------|---------|
|                  |                                                                                            | aa        | %I   | %I   | E-value | E-value |
| c23289_g1        | PHN---KGFVFELKGVKKVLKTKEEA-----HCHTIAYLYYKAVDLLGGDRYDYISPEWCRDRCEVEKIGSPNRRIGYSKNI         | 136       | 100  | 33.1 |         | -----   |
| X2G7F0_9CNID     | RYNNR---KRFFSSIWNGITGATKVATEIAKWPIRGDLNCHKHGAKIYYEAVKYFGKSYFVSSSPSEWCKEECAKNAGNPN---I----- | 142       | 40.4 | 36.9 | 3.9e-31 |         |
| c38288_g1        | LHGNVRRKRFLSALLEVWYFIQIGISKDK-----RRCNLFAEMYKYGVRTFGKSHFEIRDHDYCWNTCADKHGSPFEDVPREFF-      | 147       | 33.1 | 100  |         | N.D     |
| A0A2B4RAB8_STYPI | KGK---RWFIGDLLTKEKCKSLGADA-----YTTAVRIAGHLHWEKNSPPWCOKACAKDLGDPNILIRH-----                 | 125       | 37.7 | 36.1 | 1.2e-26 | 6.1e-26 |
| COMA_CONMA       | -----AHGTDDE-----GX-----CPX-----                                                           | 77        | N/D  | N/D  | 1.4e-08 | 2.9e-09 |
| A7T072_NEMVE     | QYGTPTDDHLDKRFLWNKQKMCNKVADG-----YHTAVQMFGEHSHWDTAKPDWCKKKCVKKIGDPRNHIQL----               | 138       | 36.1 | 31.2 | 2.2e-29 | 4.3e-18 |

A) BPI/LBP/Plunc superfamily. BPI/LBP family

BPI\_HUMAN  
LBP\_BOVIN  
c30974\_g1  
c24158\_g1  
c28966\_g1  
c25445\_g1

MRENMARGPCNAPRWASLMVLVAIGTAVTAAVNPNGVVVRISQKGLDYASQQGTAALQKELKRIKIPDYSDFSFKIKHLGKGHYSFYSMDIRFQQLPSSQISMVNPVGLKFSISNANIKISG  
----MVTSTGTLP--SLLLTGTLTFTSGALGANPLGVVRI TDQGLE YVAQEELLALQSKLHKVTLPDFNGDVRIKHFGSVDYRFHSLNIQSKCLLGSALKLLPNQGLHFSISDSFIQVTG  
----MKS-----CLIFVMLVLVIGVSLAKNPGRIRLTNNGLAYAAKITKDLIHEKIKILHKIDINGRADTP-IGHISYSLSSIHVNSFSIPTLTTLTKPKGVGLELSVSGVNI DMGG  
----MKN-----LLTLLVLVTLAVFSLATNPGIRLRLTDKGLSYAKIAVEVLNEKLTIKIPDIKGEDTP-VGHISYSLSSIKVSSLSIHTYSLTKADVGLELSVSSVSI SMSG  
----MAKMLLFFC-VAVAVFSGVARSSLPSPSEANVRLFLT KKGMDYANEAMSSIVSEVRGLRIPPVS-ITKSIWNNRIDLSLNSKVNKNVNLGSSSLSFYGYG-HIKLSLQLSSAEIVG  
----MYRMWLI FCLVFIGVCFDGGRSSPPPSKANVGLYLTKKGADYANVVMVNKT KSTMEGQKVPPVS-ISKSIWNTTIRLSLAKSKIRSVSLGDTSIKFQNG-FVKVLINIKSAEVAG  
\* . . . . . : : : : : \* . . . . . : : . . . . . : : \*

BPI\_HUMAN  
LBP\_BOVIN  
c30974\_g1  
c24158\_g1  
c28966\_g1  
c25445\_g1

KWKAQKR---FLKMSGNFDSLIEGMSISADLKLGSNPTSGKPTITCSCSSSHINSVHVHISKSKVGWLIQLFHKKIESALRNKMNSQVCEKVTNSVSSELQPYFQTL PVMTKIDSV--AG  
DWKVRKR---ILRLDGSFDVKVKGITISVNL LLDSEP-SGRPKVAVSSCSSHIRDVEVHIS-GDLGWLLNL FHNQIESRFRVRVLESKICEI IEDSVTSELQPYLQTL PVTTEIDHL--AG  
DWHYRKDHWPHISDSGFSFLKNGISFDALVKIGANP-QGHPTIAAAGC SSSVGGVDIHFS-GGASWLYNLFAGKVEHSIKKSLQSEMCKAANSAITDQGA KSFA RFPIKKKLDKW--TF  
NWHYREDHWPHISDSG SFTLTASGISFDVSIKIGATA-DGHPTIAAAGCSASIGVSIHFS-GGASWLYNLFASKIEGVIKSSLNSELCKAATSAINDQAKAVAKFPVKKQLDKY--SL  
DYKYAGG--FLGRGRGTYEVLKLRVSLTKYLSLEANT-KGKPYVNVNRECNTWIGDIDPTFR-GE SSIILNLLVQLVKRSVQRD VQKMICKSITDGINERGKKL PKLYQDKFPPIQVPSAK  
EYNYNGG--ILGSGRGTYIVKLTNVWITKELSLGVNA-KRRPFLINGKCSNWIQDTSPEPT-GGSSFIILNLLVALVRSSVNNEVRKKICTSINEAVDKQ GKMLPTYYPENYNVSRVQCAQ  
.: : \*.: . : : : . . : \* : \* . : . : . : : \* : . . . . : \* . . . : : :

BPI\_HUMAN  
LBP\_BOVIN  
c30974\_g1  
c24158\_g1  
c28966\_g1  
c25445\_g1

INYGLVAPPATTAETLDVQMKGEFYSENHHNPPFPAP---PVMEFPAAHDRMVYLG LSDYFFNTAGLVYQ EAGVLKMTLRDDMI PKESKFRLT TTKFFGTFLPEVAKKFPNMKI QIHVSAS  
LDYSLMGAPQATAQMLDMVFKEIFSRDDRFPVAF LA---PVMNLP EEHSRMVYFAISDYAFNTASLVYHKAGFLNFTITDDVIPP DSSIRQNTKSFRAFVPRIARLYPNTNLELQGA VI  
IDYSLVSSPNSTVSFIDIFLKGEFESLAHPSEAPFSP---EPLPIDSESSSMVYGWITDYMFN TAGFAYMKAGFLNHTFVPDDFPKNSSYTPNTKT FKS LI PPLYDKYPNRPMTFKVIAT  
IDYALVKSPNSTFSFLDIFVKGEFESVAHPTEAPFSP---ASLPIDS-----  
IHFPIL ESPSIQ RGSVEFVIEGGIYSRTYTL DSSSRGQGISHIRYYP SHSKMLSIVLSDRMFNSLAELYFKAGVVQINEMQM DRVNPP-----MSIKVDLA  
INIPILQOPLIMTSYIEFLMEGGVNSSCYQLNNSRLRGIRHIKIYPNLSKMISVVLSDRVINSMTDLYYKAGLMKLIETQSTDLLDP-----LWAALHLT  
.: .: \* .: . : \* . \* . :

BPI\_HUMAN  
LBP\_BOVIN  
c30974\_g1  
c24158\_g1  
c28966\_g1  
c25445\_g1

TPPHLSVQPTGLTFYPADVQAFVLPNSSLASLFLIGMHTTGSMEVSAESNRLVGELKLDRL LLELKHSNIG--PFPVELLQDIMNYI VPI LVLP RVNEKLQKGFP LPTPARVQLYNVV  
SAPCLNFSPGNLSTAAQMEIEAFVLLPNSVKEPVFRLSVATNVSAMLTFTNTSKITG FLEPGKIQVELKESKVG--RFNVELLEALLNYYLLNNFYPKVNDKLAEGFPLPLLRKIQLYDPI  
KIPNVTSKTSGVSL LIECNIEMFVDLANGSSVFALSLGLTITADLHFNFKETNLTVNSTFVRLKASLVRSAIGDITKNIQGLQFYLDFFVNGMIIRKINDRGVKGFPLPVNDGLKLVNPR  
-----  
RPPFTNTNTSGSFFTL YLNG-----TIKDRSS IYEVGLHVTGEFKIQEKKRILSGSVSNLRFELTHCAENTP--KDLKEI I VPSLFSERVQVAKEVSE S FMNDMAPLPIPTVKI INER  
SSPQINTTVNSSLV VFKMNA NF TPTCSVNKESETFSVDLEIVGDFYLEENWEVSGKVKNLRIEP-FFTDDIP--EKIKSLVLPVLKTHDSQIINQLNE-FLDKI I PLPKYSYVHFTNNO

| PSI-BLAST |                                              |     |      |      |      |         |         |         |         |
|-----------|----------------------------------------------|-----|------|------|------|---------|---------|---------|---------|
|           | aa                                           | %I  | %S   | %I   | %S   | E-value | E-value | E-value | E-value |
| BPI_HUMAN | LQPHQNFLLF GADVYK-----                       | 456 | 100  | 100  | 43.0 | 79.5    | 2e-39   | 2e-15   | 7e-04   |
| LBP_BOVIN | LQIHKDFLFLGTNVRYLRV-----                     | 456 | 43.0 | 79.5 | 100  | 100     | 3e-73   | 1e-37   | 2e-14   |
| c30974_g1 | IRSGKSFTLVSTDISYTPSEDPLEQEKLIFFGNRKIPIV----- | 481 | 28.3 | 64.3 | 29.1 | 63.6    | -----   | -----   | -----   |
| c24158_g1 | -----                                        | 248 | N/D  | N/D  | N/D  | N/D     | -----   | -----   | -----   |
| c28966_g1 | VKYGGQYIVFECDLLEKE-----                      | 434 | 20.4 | 58.6 | 19.1 | 54.1    | -----   | -----   | -----   |
| c25445_g1 | FLRKEGYTVFESDIKV-----                        | 436 | 19.3 | 53.7 | 16.9 | 53.2    | -----   | -----   | -----   |

B) L-amino-acid oxidase

OXLA\_BUNMU  
OXLA\_CALRH  
c29905\_g1  
c10621\_g1

MNVFSIFSLVFLAAFGSCADRRSPLEECFREADYEEFLEIARNGLKKT SNPKHV VVVGAGMAGLSAAY-VLEKAGHRVT LLEASDRVGG RANTYRDEKEGWYVNMGPMRLPERHRIVRTYIAK FGLK LNEFF  
MNVFFMFSLFLAALGSCADDR-NPLAECFQENDYEEFLEIARNGLKATSNPKHVVI VGAGMAGLSAAY-VLAGAGHQVT VLEASERPGGRV RTYRNEEAGWYANLGPMRLPEKHRIVREYIRKFDLRLNEFS  
-----MAEVDADVI I GAGISGLCGAKSLQDKHGLRVLVLEARDVGGRTLT SKDPL YGYLDGGTYIGATQTHIMN-LVKELGLDLYQTN  
-----MVQSVVDVIVIGGSI GLCAAK-LLKEYGFDVLVLEARDVGGRTETLE DPLFKYIDLGGSYVGADKHRILR-IAEELGVKTYPVE  
.. .: : \*.: : \*.: : \*.: : \* : \* \* : \* : \* : \* : \* . : : \* . . : : : : : :

OXLA\_BUNMU  
OXLA\_CALRH  
c29905\_g1  
c10621\_g1

QENENAWYFIRNIRKRVWEVKKDPGVFKYPVKPSEEGKSASQLYRESLKKIIEELKRTNCSYILDKYDSYSTKEYLIKEGNLSRGAVDMIG--DLLNEDSSYYLSFIESLKNDLDFSYEKRFD----EISGG  
QENDNAWYFIK NIRKKVGEVKKDPGLLKYPVKPSEAGKSAGQLYEESLGKVVEELKRTNCSYILNKYDYTSTKEYLIKEGDLSPGAVDMIG--DLLNEDSGYYVSFIESLKHDDIFAYEKRFD----EIVDG  
TEGCDIHLFLGIMKTI SHDIP LGTS-FLGALDINNFWQAIEKMSKDVP LQAPWLATKAK EWDKMTFKQFIDEKCVTRYGRAVASAFVNVNLSSEPSDISLFFFLWFLRSGGGVIRN-WEDSLGGAQ EYKIVGG  
CKGKTTDHLY--AKVRQHDGSFSTWNPLAIDYWNVAYTLDKMC DTVPDQPWEASRAIEWDHITAE EFNKVCWTSYCKKRMVQNT HHALAVELWEISLLNLYLWNRKVGEGLKHSSADDVE--DEKQFIGG  
.: : : : : . . . . . : : : : : . : : : : . : : : : . : : : : . : : \*

OXLA\_BUNMU  
OXLA\_CALRH  
c29905\_g1  
c10621\_g1

FDQLPKSMHQDIA-EMVHLNAQVT KIQHDAEKVRVAYQTPAKTL SYVTADYVIVCATSRVRRISFEPP LPSKKAHALRSIHYKSATKIFLTCTQKFWEADGIHGKSTTDLPSRFIYYPNHNFTSG--VGVI  
MDKLP TAMYRDIQ-DKVHFNAQVIKIQNDQKVTVVYETLSKETPSVTADYVIVCTTSRAVR LIKFNPPLLPKKAWHALRSVHYRSGT KIFLTCTTKFWEDDGIHGKSTTDLPSRFIYYPNHNFTNG--VGVI  
AQCISKLAERIGSDNIFNSDVTHIDQTQSEYVTVR---CLDGSVYKACVISTAPPALLNRI RFTPFLPALKQAGLSHRIPVGS IIRTVSVYENSFWREKDLTG YFLTDDGFGGPVTEAVEYSARDGNYPAL  
AQQISNKLKERLD-DKVI LNSPVQVQVKQ-ENDHVI VT---CKNRNSYQSKYVISAVPQALLSKISFEPP LPA LKNQLIQRFPMGSSIKTFAFYETA FWRSKGLNGAILSD--FG-PIHTSMDDTKPGSNLPVI  
: : . : : : : : \* : \* : : : . . . . . : . \*\* . : \* \* \* \* . \* : : . \* : . \*\* . . : \* : . : . . . . . : :

OXLA\_BUNMU

VAYVLADSDSDFQALDIKTSADIVINDLSLIHQLPKNEIQALCYPSLIK KWSLDKYTMGALTSFTPY-QFQDYSETVAAPVGRIYFAGEY TARVHG-WLDSTIKSGLTAARDVNRASQKPSRIHLISDNQL-







### C) Phospholipase B

PLB\_CROAD MIRFGNPSSSDKRRQRCRSWYGGLLLLLWAVAETRA<sup>DI</sup>HYATVYWLEAEKSFQIKD-VLDK-NGDAYGYND<sup>AI</sup>QSTGWGILEIKAGYGNQ<sup>PIS</sup>NEILMYAAGFLEG<sup>YL</sup>TASHMSDH<sup>FAN</sup>LFLPLMIK<sup>N</sup>--  
T1DLW3\_CROHD MIRFGNPSSSDKRRQRCRSWYGGLLLLLWAVAETRA<sup>DI</sup>HYATVYWLEAEKSFQIKD-VLDK-NGDAYGYND<sup>AI</sup>QSTGWGILEIKAGYGNQ<sup>PIS</sup>NEILMYAAGFLEG<sup>YL</sup>TASHMSDH<sup>FAN</sup>LFLPLMIK<sup>N</sup>--  
PLB\_DRYCN MVRFGSAASSDNR<sup>RR</sup>RCRSWYGGLLLLLWAVAETRA<sup>DL</sup>HYATVYWLEAEKSFQV<sup>KD</sup>-LLDK-NGDAYGYND<sup>T</sup>QSTGWGILEIKAGYGSQ<sup>LV</sup>SEILMYAAGFLEG<sup>YL</sup>TASRMSDH<sup>FAN</sup>LVHQ<sup>MI</sup>K<sup>N</sup>--  
c31154\_g1 MALFAVG-----YFFVVV<sup>VCY</sup>CLGSRVQSASLNGT<sup>VY</sup>VNPIDGSYDV<sup>K</sup>FGVLDKMNGAAYGTFDDNV<sup>MT</sup>SGWGELNIVAGK<sup>GK</sup>-YQDHEIMYAAGFLEGAL<sup>TAR</sup>QINDHYSNIYGIFFK<sup>NG</sup>-  
V9KKP6\_CALMI ----MCVCVRGQGLGLGLPL<sup>LV</sup>LAAVGSASARGHLLRSV<sup>LV</sup>LDEHSGRLRVVGG<sup>LN</sup>PH--SI<sup>AWAN</sup>LTD<sup>RI</sup>RATGWSFLE<sup>TG</sup>T---NGKY<sup>ND</sup>SIQAYAAGVVEAA<sup>V</sup>TQPL<sup>I</sup>YMHWMNTMP<sup>NY</sup>CGP<sup>FK</sup>  
c29069\_g1 -----MASNALLFL<sup>AI</sup>TASVCC<sup>FT</sup>IKATTYVSV<sup>LL</sup>PDGKTLK<sup>VS</sup>TGK<sup>V</sup>FP--NV<sup>AWAR</sup>FTDEIQVGSY<sup>LV</sup>EH<sup>VS</sup>---NGSY<sup>PD</sup>MLQAKAAGMAE<sup>GY</sup>ITSEMI<sup>S</sup>MAVYNQYK<sup>GY</sup>CD---

[illegible][illegible][illegible]

|                  |                                                                        | PSI-BLAST |            |            |         |         |
|------------------|------------------------------------------------------------------------|-----------|------------|------------|---------|---------|
|                  |                                                                        | aa        | %I         | %I         | E-value | E-value |
| PLB_CROAD        | -----AGCYDSKVADISMAAKFTAYAIINGPPVEKGLPVFSWVHFN-KTKHQGLPESYNFDFVTMKPVL- | 518       | 52.3       | 33.2       | 1e-179  | 6e-85   |
| T1DLW3_CROHD     | -----AGCYDSKVADISMAAKFTAYAIINGPPVEKGLPVFSWVHFN-KTKHQGLPESYNFDFVTMKPVL- | 518       | 52.5       | 33.0       | 5e-177  | N.D     |
| PLB_DRYCN        | -----AGCYDSKVADINMAAKFTAYAIINGPPVEKGLPIFSWVHFN-ETTHQGLPESYNFDFVTMKPVL- | 518       | 53.2       | 33.0       | 2e-176  | N.D     |
| <b>c31154_g1</b> | ----DGCYDAKVTDFFMANSLVSSAISGPTAQD-QPPFHWISQYFPDPDTHNGMSDLFNFDVFKMKPKL- | 522       | <b>100</b> | 34.2       |         | -----   |
| V9KKP6_CALMI     | EHRSHGGMKMTVTSFEMYKTFEMIAISGPAWDQVPPFQWSKSSYSLIHMGHDPDLWKFPVPMVRWS--   | 540       | 36.2       | 47.8       | 3e-61   | 9e-124  |
| <b>c29069_g1</b> | GHREHGTDCKITISLELFFKKFQCRAVSGPTHDDQVPVFQWSKTEWK--KPLGHPDKDFEPITVSWDKN  | 525       | 34.2       | <b>100</b> | -----   |         |
|                  | * * * * * : : : : : * : * * : : : : : : : * : * * : : : : : : :        |           |            |            |         |         |

### D) Lysosomal acid lipase/cholesteryl ester hydrolase

```

LICH_CROAD      -----MWRLLIIITAIL-FQGLVNSAMLERRKRGVD-----PETAMNISEIILFRGPYPSEEEYVVTTGDGYILCLNRPYGKI-SQKTKEP-KPAVFLQHGLLADGNSNWVTNLDYNLSGLFALADAGFD
LICH_MACFA      -----MKMFLVLGVVCL-VLWTLHEASGGKLTAVN-----PETNMNVSEIISYWGFPSEEEYLVETEDGYILCLNRPHPGRK-NHSDKGP-KPVVFLQHGLLADSSNWVTNLANSLSGLFILADAGFD
c2855_g1        -----MFTLVILALLGFASARQVNFVLVRQDQGVHVG-----ELPEVSMNVSQMI IYNGVPVENHEVTTDDGYILSLQHHPHGRQ-DKYKDVPSPKVVFLQHGLLASATNWVTNLQNSQFALADQGF
c28203_g1       MLCTNSASTATALLICMLLAFGPLQAVCRCINNTDLSKPGCIKVDPDVTRNVTQLIKSRGFPVSEYEVTTEDGFILGVQIRIPHGKKGVKTN-----GSKPVVFLQHGLLADATNWVTEWEDDSFGYILADQGF
c29969_g1       -----MSRALLVLVIFSITSHLVLGLPPLYKDKK-----VEARHPDIIDRNASQLIQNRGYPVEEYVTTKDGYVVLNQLRIPHGRNHQRTLAGCPKPAVFLQHGLLMDSTNWILNSANDSLGYILADBEGFD

```

[illegible]

[illegible]

**Figure S9) Other enzymes.** The sequences used in the alignment in A) correspond to Acetylcholinesterase (Uniprot: Q92035, ACES\_BUNFA) from *Bungarus fasciatus*; in B) correspond to Venom phosphodiesterase 1 (Uniprot: J3SEZ3, PDE1\_CROAD) and 2 (Uniprot: J3SBP3, PDE2\_CROAD) from *Crotalus adamanteus*; in C) correspond to Phospholipase B (Uniprot: F8S101, PLB\_CROAD) from *Crotalus adamanteus*, Phospholipase B-like (Uniprot: T1DLW3, T1DLW3\_CROHD) from *Crotalus horridus*, Phospholipase-B 81 (Uniprot: F8J2D3, PLB\_DRYCN) from *Drysdalia coronoides* and Phospholipase B-like (Uniprot: V9KKP6, V9KKP6\_CALMI) from *Callorhinchus milii*; in D) correspond to Acid cholesteryl ester hydrolase from *Crotalus adamanteus* (Uniprot: J3SDX8, LICH\_CROAD) and from *Macaca fascicularis* (Uniprot: Q4R4S5, LICH\_MACFA).

[illegible]

|            |                                                                                                                                         | aa  | %I   | PSI-BLAST<br>E-value |
|------------|-----------------------------------------------------------------------------------------------------------------------------------------|-----|------|----------------------|
| c26308_g1  | RDNDKWSSSCAVVYKGGWVDRCHYANLNGQYLHGKHNPWVRGVVWRNWKGHSYSLKGDELKIRPS-----                                                                  | 227 | 100  |                      |
| TL5B_TACTR | RDNDKWEKNCAEAYKGGWYNACHHSNLNGMYLRGPHEESAVGVNWNQWRGHNYSLKVSEMKIRPIIFVPGEGLPK<br>*****:..** :*****: **::***** **:* *:: ** * :***** :***** | 289 | 41.9 | 3e-73                |

[illegible]

### A.3) Veficolin-1

|             |                                                                                                                                                            |           |           |                  |                |
|-------------|------------------------------------------------------------------------------------------------------------------------------------------------------------|-----------|-----------|------------------|----------------|
| FCNV1_VARKO | -----EACS-----LACQQQEEAGAKDCKELLDRGETLT-GWYMIYPTTG---RGMRAYCDMETDGGGWLVFQRRLDGVSDFYRDWEAYKKGFGRQVSEFWLGNDKIHLLTSSGIQQLR                                    |           |           |                  |                |
| c56356_g1   | ETSPNALELCNGVSWLPLVTESKGQSMQNPGRHCLDILNSGQSRGNGLYWIDPSGGSPEDSYQALCDMTTESGGWTLVATKVS--VDFVPISSRFSGRAAQTNND--DAASHIHQALKNVWKEIL                              |           |           |                  |                |
|             | * * .                    :: * . :   . : *   :: : * : :   * * * * : *   . : * * * * : : * * * : .   : :   * * *   . : .   . :   . :   . : * *   . .   : : : |           |           |                  |                |
|             |                                                                                                                                                            |           |           | <b>PSI-BLAST</b> |                |
|             |                                                                                                                                                            | <b>aa</b> | <b>%I</b> | <b>%S</b>        | <b>E-value</b> |
| FCNV1_VARKO | IDVEDFNNSKTFAK                                                                                                                                             | 196       | 100       | 100              | 8e-10          |
| c56356_g1   | FRFSHRSDVYVIYN                                                                                                                                             | 238       | 24.2      | 47.2             |                |
|             | : . . . . : : : : :                                                                                                                                        |           |           |                  |                |

|              |                                                            | aa  | %I   | PSI-BLAST<br>E-value |
|--------------|------------------------------------------------------------|-----|------|----------------------|
| GAPR1_HUMAN  | TGHFTAMVWKN TKKMGV GKASASDGS-SFVVARYFPAGNVVNEGFFEENVLPKK-  | 154 | 100  | 3e-26                |
| c22343_g1_i1 | TGHFTQLAWKGS KEMGLGIAPSKDKSEYYIVARFRPSGNVQ GK--FVENVGPKVST | 138 | 35.3 |                      |
|              | ***** :.***.:*:*:* * *.:** * :****: *:*:* : : * * * * *    |     |      |                      |

### C.3) Venom allergen 3

|              |                                                                                                                       |  |  |  |
|--------------|-----------------------------------------------------------------------------------------------------------------------|--|--|--|
| c18947_g1_i2 | MNGGGKNYLVSVLSNATNTTDNATNSCNMPTCAPTTSVPTSAASSASSSGPSNATSGPTSSSHASSAPTSGASASTATGAPSSGGSSGSNDCCQKALAEHNAKRSVHNSPTMTIDPQ |  |  |  |
| VA3_SOLRI    | -----TNYCNLQSKRNNAIHTMCQYTSPTPGPMCLEYS-NVGFTDAEKDAIVNKHNELRQRVASGKEMRGTN-----GPQPPAVKMPNLTWDPE                        |  |  |  |
|              | : * **: * : : : * . : : : . ** . . . . : * . . . . : * : * : : : : : * : * : *                                        |  |  |  |

|              |                                                                                                                          |  |  |  |
|--------------|--------------------------------------------------------------------------------------------------------------------------|--|--|--|
| c18947_g1_i2 | LNAAAQAYAEKLATMKDIIHSPMNERQGQGENLAQRCSLPDTGFDCSKSATDMWYNEVKKYD--WGSPGYTDG-----TGHTQLVWKGTTKLIGIKAPFVNEKNLNCYVIVGRYKMAGNV |  |  |  |
| VA3_SOLRI    | LATIAQRWANQCTFEHDACRN--VERFAVGQNIATSSSGKNKSTLSDMILLWYNEVKDFDNRWISSFPDGNILMHVGHYTQIVWAKTKKIGCGRIMFK--EDNWNKHLYVCNYGPAGNV  |  |  |  |
|              | * : * * : : : : * : . * * . * : * * . * . . . : * * * * : * * . : * * . * : * * * : * * * * : * * . * * * *              |  |  |  |

|              |                      | aa  | %I   | %S   | PSI-BLAST<br>E-value |
|--------------|----------------------|-----|------|------|----------------------|
| c18947_g1_i2 | KGQFPDNVQKGSYVARRSLE | 211 | 100  | 100  |                      |
| VA3_SOLRI    | LGAQIYEIKK-----      | 253 | 25.2 | 44.4 | 7e-23                |
|              | * : : *              |     |      |      |                      |

### D) Acrohargin I

|              |                                                                                             | aa | %I   | PSI-BLAST<br>E-value |
|--------------|---------------------------------------------------------------------------------------------|----|------|----------------------|
| c25993_g1_i1 | MNQILNIFVLVGMIIYSVESRN-----KACLDACFGDYSSCQMSTSCYDQASC AKKNALYSTCQQS-CGDKRGYVPEAVIDLRRRLRLGQ | 64 | 100  |                      |
| comp58542_c0 | MNQILNIFVLVGMIIYSVESKD-----KACLDACFATYMRCLSNACYDKPSCRCQNTTYRTCVNS-CAKKRSYVPEAVIDLRRQLRLGD   | 64 | 64.1 | nd                   |
| comp66995_c0 | MNQILNIFVLVGMIIYSVESKD-----KACLDACFATYMRCLSNACYDKPSCRCQNTTYRTCVNS-CAKKRSYVPEAVIDLRRQLRLGD   | 64 | 64.2 | nd                   |
| U-AITX-Aeq5a | MNQVTIFVLVGVIVYSVESSTPDG--TWVKCRHDCFTKYKSCQMSDSCHEQSC HQCHVKHTDCVNTGCP-----                 | 50 | 23.9 | 8e-15                |
| U-AITX-Aeq5b | MNQVTIFVLVGVIVYSVESSLTPSSDIPWEKCRHDCFAKYMSCQMSDSC HNKPSCRCQCVTYAICVSTGCP-----               | 50 | 23.3 | 9e-14                |
|              | *****:*****:*:***** * . ** * **:* : : : * : * . : * . : *                                   |    |      |                      |

### E) Three-finger toxin-like

|              |                                                                                                                                   | aa | %I   | PSI-BLAST<br>E-value |
|--------------|-----------------------------------------------------------------------------------------------------------------------------------|----|------|----------------------|
| c27526_g1    | MKLTFLFVLVLAVA-IPIAFSLKCRIC A--GKICGTGPTTCPTG-DTCFTT-TYKNTSSVVKGCVTASACNQTMSCQKYP-NY CVAECCTTDGCN---SSGGFVQINVAMVTLMFAFFASIFYLFSH | 70 | 100  |                      |
| XP_020916494 | MKLALLCLAVFAVV-IPSVFSIKCYN CV--LSVCKETSCLGVG-DRCIHT-SYKNSSKVVKSCATESLCNTTKSACDKVK-NYCTTSCCMTDGCNKGDSGVAALQFN YTMLAFMALLSALLSFVKF  | 70 | 48.6 | 3e-23                |
| 3NO23_NAJAT  | MKTLLLTLLVVVTIVCLDLGYTLTCLICP--EKYCNKVHTCLNGEKICFKK-YDQKLLGKG---YIRGCADT---CPKLO-NRDVIFCCSTDKCNL-----                             | 65 | 34.3 | 0.024                |
| 3NO21_NAJAT  | MKTLLLSLVVVVTIVCLDLGYTLTCLICP--EKYCNKVHTCLNGEKICFKK-YDQKLLGKR---YIRGCADT---CPVRK-PREIVECCSTDKCNH-----                             | 65 | 32.4 | 0.014                |
| 3LK6_BUNMU   | MKTLLLSLVVVVTIVCLDLGYTRTCHIST--S---STPQTC PKGQDIFRK-TQCDKFCSIRGAVIEQGC VAT---CPEFRSNYRSLCCRTDNCNP-----                            | 66 | 33.3 | 0.012                |
| JN112568     | --MQLFGPLIFLVT-LSAAFGLRCHSCS--GKSCTGPMTCPQGTDRCAIA-ESNG--AVAKSCMLSALCVSP-----IKCCETDL CNSATPTGSSVLLLVSSGIITLFL-----               | 62 | 34.2 | 5e-05                |
| LYNX1_MOUSE  | --MTHLLTVFLVALMGLPVAQALECHVCAYNGDNCFKPMRCPAMATYCMTTRTYFTPYRMKVRKSCVPSCFET--VYDGYSKHASATSCCQYYLCN-GAGFATPVTLALVPALLATFWSLL-----    | 72 | 33.8 | 0.022                |
|              | *: : : : * . * * * * * * * * * * * * * * * * * * * * *                                                                            |    |      |                      |

**Figure S10) Other Proteins.** The sequences used in the alignment in A.1) correspond to Techylectin-5B (Uniprot: Q9U8W7, TL5B\_TACTR) from *Tachypleus tridentatus*, in A.2) to Galactose-specific lectin nattectin (Uniprot: Q66S03, LECG\_THANI) from *Thalassophryne nattereri*, in A.3) to Veficolin-1 (Uniprot: E2IYB3, FCNV1\_VARKO) from *Varanus komodoensis* and A.4) to Snaclec alboaggregin-B subunit beta (Uniprot: P81116, SLBB\_TRIAB) from *Trimeresurus albolabris*; in B) correspond to Translationally-controlled tumor protein homolog from *Anopheles gambiae* (Uniprot: Q7QCK2, TCTP\_ANOGA), *Plutella xylostella* (Uniprot: Q60FS1, TCTP\_PLUXY) and *Ixodes scapularis* (Uniprot: Q4PLZ3, TCTP\_IXOSC); in C.1) correspond to Ectin (Uniprot: B3EWZ8, ECT\_ACRMI) from *Acropora millepora*, C.2) to Golgi-associated plant pathogenesis-related protein 1 (Uniprot: Q9H4G4, GAPR1\_HUMAN) from *Homo sapiens* and C.3) to Venom allergen 3 (Uniprot: P35779, VA3\_SOLRI) from *Solenopsis richteri*; in D) correspond to U-AITX-Aeq5a (Uniprot: Q3C258, ACR1\_ACTEQ) and U-actitoxin-Aeq5b (Uniprot: Q3C257, ACR1A\_ACTEQ) from *Actinia equina*, and comp58542\_c0 and comp58542\_c0 from *Anthopleura elegantissima*; in E) correspond to uncharacterized protein (RefSeq:XP\_020916494) from *Exaiptasia pallida*, Probable weak neurotoxin NNAM3 (Uniprot: Q9YGI1, 3NO23\_NAJAT) and Probable weak neurotoxin NNAM1 (Uniprot: Q9YGI2, 3NO21\_NAJAT) from *Naja atra*, Kappa-6-bungarotoxin (Uniprot: Q9W729, 3LK6\_BUNMU) from *Bungarus multicinctus*, Ly-6/neurotoxin-like protein (JN112568) from *Epinephelus coioides* and Ly-6/neurotoxin-like protein 1 (Uniprot: P0DP60, LYNX1\_MOUSE) from *Mus musculus*.
